1           **Heh2/Man1 may be an evolutionarily conserved sensor of NPC assembly state**

2

3   Sapan Borah<sup>%</sup>, David J. Thaller<sup>%</sup>, Zhanna Hakhverdyan<sup>&</sup>, Elisa C. Rodriguez<sup>%</sup>, Michael P.  
4   Rout<sup>&</sup>, Megan C. King<sup>%</sup> and C. Patrick Lusk<sup>%\*</sup>

5

6   <sup>%</sup>Department of Cell Biology, Yale School of Medicine, 295 Congress Avenue, New Haven, CT,  
7   06520

8   <sup>&</sup>The Rockefeller University, 1230 York Avenue, New York, NY, 10065

9

10   \*Correspondence to C. Patrick Lusk

11   patrick.lusk@yale.edu

12

13

14

15 **Abstract**

16 Integral membrane proteins of the Lap2-emerin-MAN1 (LEM) family have emerged as important  
17 components of the inner nuclear membrane (INM) required for the functional and physical  
18 integrity of the nuclear envelope. However, like many INM proteins, there is limited  
19 understanding of the biochemical interaction networks that enable LEM protein function. Here,  
20 we show that Heh2/Man1 can be affinity purified with major scaffold components of the nuclear  
21 pore complex (NPC), specifically the inner ring complex, in evolutionarily distant yeasts.  
22 Interactions between Heh2 and nucleoporins is mediated by its C-terminal winged-helix (WH)  
23 domain and are distinct from interactions required for INM targeting. Disrupting interactions  
24 between Heh2 and the NPC leads to NPC clustering. Interestingly, Heh2's association with  
25 NPCs can also be broken by knocking out Nup133, a component of the outer ring that does not  
26 physically interact with Heh2. Thus, Heh2's association with NPCs depends on the structural  
27 integrity of both major NPC scaffold complexes. We propose a model in which Heh2 acts as a  
28 sensor of NPC assembly state, which may be important for NPC quality control mechanisms  
29 and the segregation of NPCs during cell division.

30

31

32

### 33 Introduction

34 The eukaryotic genome is enclosed by a nuclear envelope that is contiguous with the  
35 endoplasmic reticulum (ER). Despite this continuity, the nuclear envelope contains a unique  
36 proteome that defines its function as a selective barrier. This barrier not only establishes  
37 nuclear-cytoplasmic compartmentalization but also directly impacts genome organization and  
38 function at the nuclear periphery (Mekhail and Moazed, 2010; Taddei and Gasser, 2012;  
39 Buchwalter et al., 2019). The key elements of this biochemical specialization are the nuclear  
40 pore complexes (NPCs), which control nucleocytoplasmic molecular exchange, and proteins  
41 specifically associated with the inner and outer nuclear membranes (INM and ONM)(Ungricht  
42 and Kutay, 2017; Hampoelz et al., 2019). While ONM proteins generally act as adaptors that  
43 connect the cytoskeleton to the nucleus (Burke and Roux, 2009), INM protein function is less  
44 well defined. This is due in part to challenges inherent with defining biochemical interactions  
45 between low abundance integral membrane proteins that exist within a complex and integrated  
46 network of peripheral chromatin and nuclear scaffold proteins like the lamins (outside of yeasts).  
47 Nonetheless, there is confidence that there are several dozen integral INM proteins with the  
48 most evolutionarily conserved families being the LAP2-emerin-MAN1 (LEM) proteins and the  
49 SUN family proteins (Mans et al., 2004; Ungricht and Kutay, 2015).

50 LEM family proteins are so named for their LEM domain, a short ~40 amino acid helix-  
51 extension-helix motif that, at least in higher eukaryotes, binds to barrier to autointegration factor  
52 (BAF)(Furukawa, 1999; Cai et al., 2007). As there is no BAF in yeasts, the LEM domain must  
53 possess other conserved functions, which may more directly relate to genome integrity,  
54 ensuring the stability of repetitive DNA (Mekhail et al., 2008), and also contributing to the  
55 mechanical integrity of the nucleus (Schreiner et al., 2015). There are up to seven LEM domain  
56 proteins in humans but in the two most commonly used yeast models, *Saccharomyces*  
57 *cerevisiae* (Sc) and *Schizosaccharomyces pombe* (Sp) there are only two:  
58 ScHeh1(Src1)/SpHeh1(Lem2) and ScHeh2/SpHeh2(Man1)(Barton et al., 2015). Of these two,  
59 ScHeh1 and SpHeh1 are likely orthologs derived from a common ancestor, while ScHeh2 and  
60 SpHeh2 resulted from independent duplication events of their respective paralogs ScHeh1 and  
61 SpHeh1 (Rhind et al., 2011; Gonzalez et al., 2012). Despite their independent evolutionary  
62 history, there is evidence that Heh2 in both yeasts specifically makes functional connections  
63 with NPCs. For example, in *S. cerevisiae*, we demonstrated synthetic genetic interactions  
64 between genes encoding NPC components (nucleoporins or nups), and *HEH2* (Yewdell et al.,  
65 2011). In the *S. pombe* cousin, *S. japonicus*, it has also been suggested that Heh2 supports

66 connections between chromatin and NPCs to support their segregation between daughter cells  
67 in mitosis (Yam et al., 2013). However, the underlying biochemical connections between Heh2  
68 and the NPC are not understood.

69 Understanding the nature of the connections between Heh2 and the NPC may also help  
70 illuminate mechanisms underlying the biogenesis of NPCs. As the total proteome, interactome  
71 and structure of NPCs have come to light, it is now understood that the enormous (50-100 MD)  
72 NPC is built from a relatively small (~30) number of nups (Hampoelz et al., 2019). These nups  
73 are organized into modular subcomplexes that, in multiples of 8, assemble the 8-fold radially  
74 symmetric NPC scaffold composed of inner and outer ring complexes (IRC and ORC), the  
75 central transport channel and asymmetric (perpendicular to the plane of the nuclear envelope)  
76 cytosolic filaments/mRNA export platform and nuclear basket (Kosinski et al., 2016; Kim et al.,  
77 2018). How NPCs are assembled in space and time during interphase remains ill-defined, but  
78 likely begins within the nucleus at the INM (Marelli et al., 2001; Makio et al., 2009; Yewdell et  
79 al., 2011; Mészáros et al., 2015; Otsuka et al., 2016). The recruitment of nups to an assembly  
80 site occurs alongside membrane-remodeling that evaginates the INM and ultimately drives  
81 fusion with the ONM (Otsuka et al., 2016). Consistent with an inside-out model, the cytosolic-  
82 facing mRNA export platform is likely added at a terminal step in NPC assembly (Otsuka et al.,  
83 2016; Onischenko et al., 2017). In genetic backgrounds where the cytoplasmic-facing mRNA  
84 export platform is not assembled, herniations or blebs are observed over assembling NPCs,  
85 which may reflect defects in INM-ONM fusion and/or the triggering of NPC assembly quality  
86 control pathways (Thaller and Lusk, 2018).

87 Both Heh1 and Heh2 have been implicated in mechanisms of NPC assembly quality control in  
88 which they regulate the recruitment of the endosomal sorting complexes required for transport  
89 (ESCRT) to the nuclear envelope (Webster et al., 2014, 2016; Thaller et al., 2019). One early  
90 model suggested that Heh2 may differentially bind to NPC assembly intermediates over fully  
91 formed NPCs (Webster et al., 2014). However, this has yet to be formally interrogated. In order  
92 to be more incisive as to how Heh2 impacts NPC function, here we have thoroughly analyzed  
93 the biochemical interaction network of endogenous Heh2. Using two evolutionary distant yeasts,  
94 we show that Heh2 can co-purify with the NPC's IRC. These interactions do not require the LEM  
95 domain or any INM targeting sequences but instead depend on a C-terminal domain predicted  
96 to fold into a winged helix (WH)(Caputo et al., 2006). Further, by decoupling NPC clustering  
97 from perturbations to NPC structure, we demonstrate that Heh2 associates with NPCs *in vivo*.  
98 Most interestingly, the association of Heh2 with the NPCs can be completely broken by

99 knocking out Nup133, a nucleoporin of the ORC, suggesting that Heh2's association with the  
100 NPC depends on its structural integrity. Taken together, we suggest a model in which Heh2 may  
101 be a sensor of NPC assembly state.

102

## 103 **Results**

### 104 **Heh2 binds to specific nups in evolutionarily distant yeasts**

105 To better define the interacting partners of Heh1 and Heh2, we performed one-step affinity  
106 purifications of Heh1-TAP and Heh2-TAP (produced at endogenous levels) from cryolysates  
107 derived from logarithmically growing budding yeast (Hakhverdyan et al., 2015). As shown in Fig.  
108 1A, we did not detect any obvious stoichiometric binding partners of Heh1-TAP despite robust  
109 recovery of the fusion protein. In marked contrast, Heh2-TAP co-purified with at least 8  
110 additional proteins, which were visible by SDS-PAGE and Coomassie blue staining of bound  
111 fractions. Excision of these bands followed by mass spectrometric (MS) protein identification  
112 revealed that Heh2 binds to the IRC of the NPC and a subset of cytosolic-facing nups, including  
113 Nup159, Nup188, Nup192, Nup170, Pom152, Nup157, Nup116, Nic96 and Nsp1. For context,  
114 we have colored the identified nups in a diagram of a single spoke from the budding yeast NPC  
115 structure (Kim et al., 2018) in Fig. 1A.

116 We were next curious whether Heh2's association with the NPC was also observed in other  
117 yeast species where the NPC structure is different than in budding yeast. For example, fission  
118 yeast NPCs are made up of a similar catalogue of nups (Baï et al., 2004; Chen et al., 2004;  
119 Asakawa et al., 2014), but there is evidence that there is asymmetry with respect to the ORC,  
120 which contains 16 copies (instead of 8) of the "Y" complex on the nucleoplasmic side of the  
121 NPC (Asakawa et al., 2019). Of additional interest, although *HEH1* in both *S. cerevisiae* and *S.*  
122 *pombe* is derived from a common ancestor, these yeasts are separated by ~500 million years of  
123 evolution (Rhind et al., 2011). Intriguingly, and in contrast, *ScHEH2* and *SpHEH2* arose from  
124 distinct duplication events (Mans et al., 2004), and might therefore be expected to carry out  
125 distinct functions.

126 Interestingly however, despite this unique evolutionary history, the affinity-purifications of  
127 SpHeh2-TAP and SpHeh1-TAP were qualitatively similar to the *S. cerevisiae* versions with  
128 SpHeh1-TAP co-purifying with few specific proteins (compare to the WT control) and SpHeh2-  
129 TAP with several specific species (Fig. 1B). Note that SpHeh2-TAP is proteolytically sensitive

130 and is purified both as a full length (~115 kDa) and a smaller (~65 kDa) form (Fig. 1B).  
131 Nonetheless, like its distant *S. cerevisiae* cousin, the SpHeh2-complex consisted of essentially  
132 the same subset of inner ring nups including Nup184, Nup186, Nup155, Pom152, Npp106,  
133 Nup98 and Nup97 (Fig. 1B). To facilitate a comparison, the *S. cerevisiae* homologues are listed  
134 next to the identified *S. pombe* nups in Fig. 1B. Thus, despite the distinct duplication events that  
135 gave rise to *HEH2* in both species, the physical association of Heh2 with the IRC likely points to  
136 an important and conserved function that was likely shared by a common ancestor before being  
137 independently specialized in the two species lineages.

138

### 139 **Heh2 fails to interact with NPCs lacking Nup133**

140 That Heh2 binds to nups suggests that it may be a component of the NPC. To assess this  
141 possibility, we next examined the distribution of Heh2-GFP at the nuclear envelope alongside an  
142 NPC marker, Nup82-mCherry. We also took advantage of a standard approach of knocking out  
143 *NUP133*, which leads to NPC clustering and facilitates co-localization analysis, as individual  
144 NPCs cannot be resolved with conventional light microscopy (Doye et al., 1994; Pemberton et  
145 al., 1995; Li et al., 1995; Aitchison et al., 1995; Heath et al., 1995). Consistent with prior work  
146 (Yewdell et al., 2011), we observed a punctate NPC-like distribution of Heh2-GFP at the nuclear  
147 envelope of otherwise WT cells, which exhibited some co-localization with Nup82-mCherry (Fig.  
148 2A). Indeed, when we quantified the correlation between the GFP and mCherry fluorescence at  
149 each pixel along the nuclear envelope of 20 cells, we observed a modest positive correlation ( $r$   
150 = 0.39; Fig. 2B). In marked contrast, deletion of *NUP133* led to a striking anti-correlation  
151 between Nup82-mCherry and Heh2-GFP ( $r = -0.27$ ), which was obvious in the micrographs  
152 where Heh2-GFP was diminished or undetectable at the Nup82-mCherry clusters (Fig. 2A, B,  
153 bottom panels). We note further that Heh2-GFP is no longer punctate along the nuclear  
154 envelope in *nup133Δ* cells, which suggests that there may in fact be an association with NPCs  
155 (as supported by the biochemistry) but that this interaction is broken without Nup133.

156 To continue with the exploration of potential functional commonalities between ScHeh2 and  
157 SpHeh2, we also tested whether deletion of the orthologous *S. pombe Nup132* impacted  
158 SpHeh2-GFP distribution (Baï et al., 2004). As has been reported by others, SpHeh2 also has a  
159 punctate distribution evocative of NPCs (Fig. 2C)(Gonzalez et al., 2012; Steglich et al., 2012).  
160 Consistent with this, we observed coincidence between SpHeh2-GFP and SpNup107-mCherry  
161 fluorescence with a correlation value of  $r = 0.49$  (Fig. 2D, top). Interestingly, as in *S. cerevisiae*,  
162 deletion of *Nup132* lead to a clear anti-correlation ( $r = -0.03$ ) of the SpHeh2-GFP and

163 SpNup107-mCherry signals, suggesting that their physical interaction could be disrupted (Fig.  
164 2D, bottom). Remarkably, this anti-correlation was observed even with minimal clustering of  
165 SpNup107-mCherry in this strain (Fig. 2C). Thus, this result reinforces that disrupting NPC  
166 structure by deleting a critical ORC component compromises Heh2's ability to interact with  
167 NPCs in both organisms.

168

## 169 **Heh2 co-localizes with NPCs**

170 To reconcile the apparent inconsistency between the affinity purifications, which suggested that  
171 Heh2 binds NPCs, and the lack of Heh2-GFP co-clustering with nups in *nup133Δ* strains, we  
172 sought an orthogonal approach to assess Heh2-GFP co-localization with NPCs that were not  
173 missing key structural components. In prior work, we observed that the anchor-away approach  
174 (Haruki et al., 2008)(Fig. 3A) can drive rapid NPC clustering through the rapamycin-induced  
175 dimerization of a Nsp1-FRB fusion that was incorporated into NPCs (and likely exposed to the  
176 cytosol) with Pma1-FKBP12 (a plasma membrane anchor, Fig. 3A) within 15 min (Colombi et  
177 al., 2013). The rapidity of this response strongly suggested that fully formed NPCs are driven  
178 into clusters independent of NPC mis-assembly. Further, we did not detect any removal of  
179 Nsp1-FRB from NPCs under these conditions (Colombi et al., 2013). Consistent with this, we  
180 assessed the co-localization of Nup82-GFP with Nup170-mCherry in strains expressing Nsp1-  
181 FRB and Pma1-FKPB12 in the presence of carrier alone (DMSO) or rapamycin. As expected,  
182 both of the fluorescent proteins localized in a punctate distribution at the nuclear envelope in the  
183 presence of DMSO with a significant  $r = 0.48$  positive correlation between the GFP and  
184 mCherry fluorescence (Fig. 3B, far right panel). Upon addition of rapamycin, we observed rapid  
185 clustering and concurrent co-localization of both signals along the nuclear envelope, which was  
186 evident in the coincidence of the GFP and mCherry fluorescence peaks of line profiles along the  
187 nuclear envelope and a correlation that increased to  $r = 0.74$  (Fig. 3B, middle and right panels).

188 We next tested how this approach to NPC clustering influenced Heh2-GFP localization. As a  
189 control, we also assessed the distribution of Heh1-GFP, which does not stably interact with  
190 nups (Fig. 1A). As shown in Fig. 3C, the addition of rapamycin lead to the clear co-localization  
191 of Heh2-GFP and Nup170-mCherry. This again was evident through the examination of line  
192 profiles of a representative nuclear envelope where there was coincidence between the peaks  
193 of the GFP and mCherry fluorescence and further supported by the increased positive  
194 correlation of GFP and mCherry fluorescence (from  $r = 0.18$  to  $r = 0.64$ ; Fig. 3C, middle and

195 right panels). Note, however, that unlike the comparison between the two nups (Fig. 3B), there  
196 are peaks of Heh2-GFP fluorescence that are not coincident with the NPC clusters (Fig. 3C,  
197 arrowheads in line profiles). Thus, while it is clear that Heh2-GFP associates with NPCs, there  
198 is also an additional pool of Heh2-GFP at the INM. Last, we did not observe similar effects with  
199 Heh1-GFP, which failed to cluster with NPCs (Fig. 3D) or correlate with their distribution ( $r = -$   
200  $0.01$ )(Fig. 3D, right panel). Thus, this NPC clustering approach more faithfully mirrored our  
201 biochemical analysis of both Heh1 and Heh2 and supports the interpretation that Heh2 is a  
202 shared component of NPCs and the INM.

203

### 204 **Inhibition of NPC assembly reduces the Heh2 pool bound to NPCs**

205 A model in which there are two pools of Heh2 was further supported by experiments where we  
206 reduced NPC number by inhibiting NPC assembly. For example, by again leveraging the  
207 anchor-away strategy, we inhibited NPC assembly by trapping newly synthesized Nup192-FRB-  
208 GFP for 3 h (Colombi et al., 2013). Under these conditions, there is a reduction of NPCs that is  
209 reflected by lower levels of Nup192-FRB-GFP at the nuclear envelope and a concomitant  
210 accumulation of newly synthesized Nup192-FRB-GFP at the plasma membrane (Fig. 4A, B,  
211 rapamycin panels). In this scenario, we tested whether Nup192-FRB-GFP and Heh2-mCherry  
212 co-localized at the nuclear envelope (Fig. 4B). As a control, we also tested co-localization with  
213 Pom152-mCherry (Fig. 4A). While Pom152-mCherry distribution was similar to Nup192-FRB-  
214 GFP with line profiles showing coincidence between mCherry and GFP fluorescence peaks  
215 along the nuclear envelope (Fig. 4A, far right), there were clear gaps in the Nup192-FRB-GFP  
216 signal that were filled by Heh2-mCherry (Fig. 4B, see arrowheads). This result is also  
217 represented in line profiles across the nuclear envelope where the Heh2-mCherry signal fills  
218 areas that are devoid of GFP-peaks (Fig. 4B, right bottom panel). Importantly, however, a  
219 subset of Nup192-FRB-GFP peaks that likely correspond to NPCs that were assembled prior to  
220 rapamycin addition still coincided with Heh2-mCherry peaks (Fig. 4B, right bottom panel). Thus,  
221 these data are consistent with the interpretation that inhibition of NPC assembly leads to a  
222 decrease in the pool of Heh2 bound to NPCs (due to their reduced number) and an increase in  
223 the free pool at the INM. This conclusion is further supported by affinity-purifications of Heh2-  
224 TAP from Nup192-FRB-GFP strains under the same conditions. While in DMSO-treated  
225 conditions the expected IRC profile of nups was detected (Fig. 4C), upon inhibition of NPC  
226 assembly with rapamycin, we observed a ~2-3 fold reduction of these nups (orange line in  
227 densitometry plot at right) while the total amount of Heh2-TAP affinity purified remained



228 unchanged (Fig. 4C). Thus, we favor a model in which Heh2 remains capable of binding to the  
229 IRC in fully formed NPCs, even when their number is decreased upon assembly inhibition.

230

### 231 **Heh2's association with NPCs depends on the integrity of the NPC scaffold**

232 If Heh2 binds the IRC, it remained unclear why deletion of *NUP133* abrogated Heh2's NPC  
233 association, as the IRC is expected to be intact in this background. Thus, to rule out that Heh2  
234 may be binding IRC nups outside of the context of fully formed NPCs, we directly tested  
235 whether deletion of *NUP133* lead to a loss of Heh2 IRC binding. Strikingly, affinity purifications  
236 of Heh2-TAP in *nup133Δ* cells did not reveal any obvious binding partners, with the potential  
237 exception of Nup159, further supporting the *in vivo* evidence that the structurally deficient  
238 *nup133Δ* NPCs are incompetent for binding Heh2 (Fig. 5A). This result is illustrated as a loss of  
239 the colored Heh2-interacting nups within the context of a side and center view of a NPC spoke  
240 in Fig. 5B. Consistent with the conserved lack of colocalization of scHeh2-GFP and spHeh2-  
241 GFP with NPCs in the absence of Nup133/Nup132, we also observed a loss of nups in affinity-  
242 purified fractions of SpHeh2-TAP from *nup132Δ* extracts (Fig. 5C).

243 We next explored the hierarchy of physical interactions that control Heh2's association with the  
244 IRC by affinity-purifying Heh2-TAP from several IRC nup deletion backgrounds. Interestingly,  
245 and in contrast with the deletion of *NUP133*, we were unable to define any single knockout of an  
246 inner ring nup that fully broke Heh2's biochemical association with this complex. For example, in  
247 cases where we deleted the genes encoding Nup157 or Pom152, we observed the discrete loss  
248 of these, and only these, proteins from bound fractions (Fig. 5A, B). Deletion of *NUP170* and  
249 *NUP188* led to a more severe disruption of nups bound to Heh2, but in these cases, Pom152  
250 and a band at the molecular weight of Nup159 remained (Fig. 5A, B). Thus, it seems likely that  
251 Heh2 makes several direct connections to nups in the IRC, with the most obvious candidates  
252 being Pom152, Nup170 and/or Nup188. Heh2 may also directly bind to Nup159, although this  
253 association alone is insufficient to maintain association with the NPC *in vivo* (Fig. 2A).

254 Our inability to fully break interactions between Heh2 and the NPC by abrogating single nups  
255 within the IRC was further supported by the lack of any major changes to Heh2-GFP distribution  
256 in the *nup170Δ*, *nup188Δ* and *pom152Δ* strains; in all cases the punctate, NPC-like distribution  
257 of Heh2-GFP was retained (Fig. 5D). The one potential exception here was that, in addition to  
258 the punctate nuclear envelope distribution, a cortical ER pool of Heh2-GFP could be discerned  
259 specifically in *nup170Δ* strains (Fig. 5D, arrowhead). These data are consistent with prior work

260 demonstrating that Nup170 is uniquely required for the efficient targeting of overexpressed  
261 Heh2 to the INM (King et al., 2006). Thus, we suggest that, with the exception of Nup170, the  
262 physical interactions with the IRC described here are dispensable for INM targeting. Such an  
263 assertion is further supported by the exclusive nuclear envelope localization of Heh2-GFP in  
264 *nup133Δ* cells where virtually all of its biochemical interactions to the NPC are broken (Fig. 2A).  
265 These data thus make the prediction that the INM targeting and NPC-binding elements of Heh2  
266 are distinct.

267

### 268 **The conserved WH domain of Heh2 is required for NPC association**

269 To explore the possibility that INM targeting and NPC-binding may require unique structural  
270 elements of Heh2, we generated truncations of Heh2 where the N-terminal nucleoplasmic  
271 domain (which contains the INM-targeting information (King et al., 2006; Meinema et al., 2011))  
272 and the C-terminal WH domains are deleted (Fig. 6A). Interestingly, deletion of the N-terminus  
273 did not impact binding to nups, as a similar (if more robust) profile of the IRC was recovered in  
274 affinity purifications of heh2-(316-663)-TAP (Fig. 6B). These data suggest that Heh2 can reach  
275 the NPC (or at least bind to nups) in the absence of its N-terminal INM targeting domain. In  
276 marked contrast, deletion of the WH domain, which does not impact INM targeting (Meinema et  
277 al., 2011), led to a striking reduction of nup binding (Fig. 6B). These results were also mirrored  
278 *in vivo*. For example, compared with Heh2-GFP, heh2-(1-570)-GFP did not exhibit a punctate  
279 distribution at the nuclear envelope (Fig. 6C), which was quantified as a reduced coefficient of  
280 variation of the fluorescence signal along the nuclear envelope (Fig. 6D). Consistent with the  
281 idea that this change in localization of heh2-(1-570)-GFP was due to a loss of its interaction with  
282 NPCs, it also failed to cluster with NPCs in the Nsp1-FRB NPC clustering assay (Fig. 6E) with  
283 no positive correlation between heh2-(1-570)-GFP and Nup170-mCherry signals in either  
284 DMSO ( $r = 0.0$ ) or rapamycin ( $r = -0.08$ ) treated cells (Fig. 6F). Thus, the WH domain of Heh2  
285 is the major determinant of its association with NPCs.

286

### 287 **WH-domain-mediated interactions with NPCs are required for normal NPC distribution**

288 As the Heh2 WH-domain was specifically required for Heh2-binding to NPCs, but not for INM  
289 targeting, there was an opportunity to define a putative NPC-specific function for Heh2. Indeed,  
290 deletion of *HEH2* leads to a marked clustering of Nup82-GFP, which was quantified as a

291 coefficient of variation (CV) of the fluorescence along the nuclear envelope that was  
292 approximately double the value in WT cells (Fig. 6G, H). To directly test whether this phenotype  
293 was due to a loss of nup-binding, we assessed the distribution of Nup82-GFP in cells  
294 expressing *heh2-(1-570)*. Indeed, as shown in Fig. 6G, this targeted abrogation of the nup-  
295 binding WH domain also resulted in a clear redistribution of Nup82-GFP, showing a clustering  
296 coefficient nearly identical to that seen in *heh2Δ* cells (Fig. 6H). Thus, interactions between  
297 Heh2 and the NPC are required for normal NPC distribution.

298 Interestingly, expression of *heh2-(316-663)* from its endogenous locus also impacted NPC  
299 distribution, but with a unique phenotype. Because this truncation of Heh2 lacks its INM  
300 targeting information, this fusion will be mislocalized to the endoplasmic reticulum (King et al.,  
301 2006; Meinema et al., 2011). In these cells, Nup84-GFP accumulated in clusters at the nuclear  
302 envelope but also appeared within cytosolic foci (Fig. 6I, arrowheads) in ~17% of cells. Together  
303 then, these data support a model in which both the N-terminal and C-terminal domains of Heh2  
304 are important for NPC distribution, however, the underlying mechanisms behind these  
305 alterations are unique and reflect either too little (in the case of *heh2-(1-570)*) and likely  
306 inappropriate (in the case of *heh2-(316-663)*) interactions with nups.

307

## 308 **Discussion**

309 We have explored the physical and functional relationship between the integral INM protein  
310 Heh2 and the NPC. This study was motivated by our prior discovery of predominantly genetic  
311 interactions between *HEH2* and nup genes (Yewdell et al., 2011), in addition to other work  
312 considering Heh2 as a factor in a NPC assembly surveillance pathway (Webster et al., 2014,  
313 2016). In the latter, we imparted Heh2 the ability to discern between NPC assembly  
314 intermediates and fully formed NPCs. This concept was centered, in part, on data showing that  
315 Heh2 does not associate with clustered NPCs in *nup133Δ* strains, which was interpreted in a  
316 model where Heh2 does not bind to fully formed NPCs. We now provide a more nuanced  
317 explanation for these data, as deletion of Nup133 breaks Heh2's otherwise robust physical  
318 association with the NPC (Fig. 5A). Thus, in light of the new data presented here, a  
319 reconsideration of the role of Heh2 in NPC biology is needed. Given these new observations,  
320 we suggest that Heh2 likely binds to fully formed NPCs. Several data support this assertion  
321 including: 1) The biochemical interactions that suggest the formation of a stable complex  
322 between Heh2 and the IRC (Fig. 1A, B). 2) The maintenance of these interactions even upon

323 NPC assembly inhibition (Fig. 4C) and 3) The punctate distribution of Heh2 at steady-state and  
324 upon clustering of functional NPCs driven by the anchoring of Nsp1-FRB (Fig. 3C).

325 Despite the demonstration that Heh2 associates with NPCs, several new conundrums arise as a  
326 consequence of this work. The first is that we do not observe any robust physical association  
327 between Heh2 and the ORC, and yet, deletion of Nup133 leads to a loss of Heh2 binding to the  
328 NPC (Fig. 5A). In contrast, we cannot break Heh2's association with NPCs by knocking out any  
329 individual component of the IRC (Fig. 5A, D). While the latter can be explained in a model where  
330 Heh2 makes several direct but redundant connections with nups, likely Pom152 and Nup170  
331 and/or Nup188, the former is more challenging to interpret. Several potential models can be  
332 considered. The first deals with the very nature of *nup133Δ* NPC clustering, which has so far  
333 remained only partially explained on a mechanistic level. For example, one thought is that the  
334 association of NPCs with the pore membrane is destabilized without the amphipathic  
335 helix/ALPS motif in Nup133 (Drin et al., 2007), which may lead to pore clustering (Fernandez-  
336 Martinez et al., 2012). In such a scenario, given that it is an integral membrane protein, Heh2's  
337 interactions with the NPC may depend on the presence of specific lipids or membrane curvature  
338 (or both) at the pore membrane. Alternatively, the clustering itself may sterically preclude an  
339 interaction with Heh2. It is also possible that the IRC may not be fully functional or be  
340 structurally perturbed in this context. Regardless of the underlying mechanism, as Heh2's  
341 association with the NPC ultimately depends on the function of both of its major scaffold  
342 complexes (i.e. the IRC and ORC), we favor a model in which Heh2 can, through a mechanism  
343 that remains to be defined, "sense" the structural integrity of the NPC.

344 A model in which Heh2 is a sensor for the NPC scaffold fits within a quality control mechanism  
345 framework. For example, recent work suggests that NPC clustering can facilitate clearance of  
346 NPCs by autophagy (Lee et al., 2020). Thus, it is tempting to speculate that damage to the NPC  
347 scaffold may trigger the release of Heh2, which would in turn lead to the clustering of damaged  
348 NPCs. Such an idea is supported by the clustering that we observe in contexts where Heh2-  
349 NPC interactions are abrogated (Fig. 6G, H). Similarly, as we have previously reported, NPC  
350 clustering may also be an input that ensures that damaged or malformed NPCs are not  
351 transmitted to daughter cells (Webster et al., 2014). Thus, the consistent theme is that breaking  
352 interactions between Heh2 and NPCs may be an input to their segregation and/or clearance. A  
353 corollary to this is that Heh2 bound to NPCs may in fact promote the inheritance of functional  
354 NPCs. This may be best illustrated by work from *S. japonicus* where it was demonstrated that  
355 the Heh2 orthologue contributes to anchoring NPCs to chromatin to promote their proper

356 segregation between daughters (Yam et al., 2013). Indeed, our observation that Heh2 also  
357 engaged in interactions with the IRC in *S. pombe* argues that it supports a fundamental role(s)  
358 across diverse yeasts.

359 How, then, do interactions between Heh2 and NPCs ensure proper NPC distribution? We  
360 speculate that in the absence of mechanisms to keep NPCs apart, NPCs have an inherent  
361 conformation or affinity that drives their clustering. In this scenario, binding NPCs to INM  
362 proteins could help ensure their physical segregation. Although this could be envisaged purely  
363 as a steric inhibition of NPC-NPC interactions, we favor the concept that the distribution of  
364 NPCs and other elements of the nuclear architecture are co-dependent. Indeed, our prior work  
365 suggests that SpHeh2 antagonizes the flow of chromatin into nuclear deformations (Schreiner et  
366 al., 2015), in essence maintaining normal chromatin distribution at the nuclear periphery, a  
367 direct corollary of the effect here on NPC distribution. As SpHeh2 binds both chromatin  
368 (Gonzalez et al., 2012; Steglich et al., 2012) and NPCs (this work), it is tempting to speculate  
369 that it supports the normal organization of NPCs and chromatin by dynamically linking these two  
370 major structural components of the nucleus. This concept is consistent with evidence in  
371 mammalian cells where NPCs are well established to be anchored to the lamin network (Daigle  
372 et al., 2001; Maeshima et al., 2006; Xie and Burke, 2017; Kittisopikul et al., 2020). In scenarios  
373 in which this lamin connection is broken, for example in lamin knockouts, NPCs also cluster  
374 together (Xie and Burke, 2017; Kittisopikul et al., 2020). Although NPCs are more dynamic  
375 along the nuclear envelope in budding yeast (Belgareh and Doye, 1997; Bucci and Wentz,  
376 1997), their interactions with chromatin through multiple mechanisms (Luthra et al., 2007; Tan-  
377 Wong et al., 2009) could nonetheless contribute to their normal distribution. Whether clustering  
378 has an impact on NPC function per se remains ill defined, although one could speculate that  
379 NPC clustering has a more profound impact on the NPC's roles in chromatin organization and  
380 gene expression as opposed to nuclear transport (Capelson et al., 2010; Raices and D'Angelo,  
381 2017).

382 One particularly interesting feature of our analysis of Heh2 is that the NPC binding and INM  
383 targeting sequences are distinct and on two physically separated domains. Certainly there is  
384 evidence from both genetic and biochemical analyses where the function of specific domains of  
385 the LEM domain proteins can be separated (Grund et al., 2008; Yewdell et al., 2011; Barrales et  
386 al., 2016; Hirano et al., 2018; Thaller et al., 2019; von Appen et al., 2020). However, we wonder  
387 whether there are functional implications for the integration of these two interaction platforms,  
388 which could place Heh2 in a tug-of-war between its residence bound to the NPC and its release

389 to the INM. This would be yet another example in an emerging theme for these LEM domain  
390 proteins in which they bridge distinct sets of physical interactions to maintain the dynamic  
391 organization of the nuclear envelope system.

392 **Figure legends**

393 **Figure 1. Heh2 binds to specific nups in evolutionary distant yeasts**

394 (A) Heh2 specifically binds the IRC. Affinity purifications were performed from cell extracts  
395 derived from strains expressing endogenous Heh1-TAP or Heh2-TAP or from WT cells (no  
396 TAP). Bound proteins were separated by SDS-PAGE and visualized by Coomassie staining.  
397 Numbers at left indicate position of MW standards in kD. Heh1-TAP and Heh2-TAP are  
398 indicated, and colored circles demark proteins identified by MS from Heh2-TAP lane, as  
399 indicated in key. This color scheme is also used to indicate positions of nups within a single  
400 spoke of the NPC structure (from PDBDEV\_00000010; Kim et al., 2018). ORC is outer ring  
401 complex, IRC is inner ring complex.

402 (B) As in A but affinity purifications performed from *S. pombe* cell extracts. The corresponding  
403 *S. cerevisiae* homologues of the identified *S. pombe* nups are also listed.

404

405 **Figure 2. Heh2 fails to interact with NPCs lacking Nup133**

406 (A) Deconvolved fluorescence micrographs of Heh2-GFP and Nup82-mCherry with merge in  
407 WT and *nup133Δ* strains. Arrowheads point to regions depleted of Heh2-GFP that contain  
408 Nup82-mCherry in a cluster. Scale bar is 5 μm.

409 (B) Scatterplot with Pearson correlation coefficient ( $r$ ) of Heh2-GFP and Nup82-mCherry  
410 fluorescence intensity (in arbitrary units, a.u.) along the nuclear rim of 20 cells, from two  
411 independent experiments.

412 (C) Deconvolved fluorescence micrographs of SpHeh2-GFP, and SpNup107-mCherry with  
413 merge in WT and *nup132Δ S. pombe* cells. Scale bar is 5 μm.

414 (D) Scatterplot with Pearson correlation coefficient ( $r$ ) of SpHeh2-GFP and SpNup107-mCherry  
415 fluorescence intensity (in arbitrary units, a.u.) along the nuclear rim of 20 cells, from two  
416 independent experiments.

417

418 **Figure 3. Heh2 associates with NPCs in vivo.**

419 (A) Schematic of NPC clustering assay mediated by the rapamycin-induced dimerization of  
420 Nsp1-FRB (at the NPC) and Pma1-FKBP12. N is nucleus, V is vacuole.

421 **(B-D)** Left: Deconvolved fluorescence micrographs of indicated GFP tagged proteins and  
422 Nup170-mCherry as a NPC marker with merge in cells treated with DMSO (carrier) or  
423 rapamycin for 15 min. Scale bar is 5  $\mu$ m. Middle: Line profiles of fluorescence intensity of GFP  
424 and mCherry fusions (in arbitrary units, a.u.) along the nuclear envelope of a single cell. Right:  
425 Scatterplot with Pearson correlation coefficient ( $r$ ) of GFP and mCherry fluorescence intensity  
426 (in arbitrary units, a.u.) along the nuclear rim of 30 cells, from three independent experiments.

427

#### 428 **Figure 4. Inhibition of NPC assembly reduces the Heh2-nup bound pool**

429 **(A, B)** Deconvolved fluorescence micrographs of Nup192-FRB-GFP with either Pom152-  
430 mCherry or Heh2-mCherry with merge after treating cells with DMSO (carrier) or rapamycin for  
431 3 h to inhibit NPC assembly. Note accumulation of newly synthesized Nup192-FRB-GFP at the  
432 plasma membrane as it binds to the Pma1-FKBP12 anchor. Arrowheads point to Heh2-mCherry  
433 at the nuclear envelope that is resolvable from Nup192-FRB-GFP signal. Scale bar is 2  $\mu$ m. At  
434 right are line profiles of GFP and mCherry fluorescence intensity (in arbitrary units, a.u.) along  
435 the nuclear envelope of single cells corresponding to DMSO (top) and rapamycin (bottom)  
436 conditions.

437 **(C)** Inhibiting NPC assembly reduces Heh2-IRC binding. Affinity purifications were performed  
438 from cell extracts derived from cells expressing Heh2-TAP with Nup192-FRB-GFP and Pma1-  
439 FKBP12 treated with carrier (DMSO) alone, or with rapamycin (rap) to inhibit NPC assembly.  
440 Bound proteins were separated by SDS-PAGE and visualized with Coomassie. Position of MW  
441 markers (kD) are indicated at left and proteins are marked with colored circles that denote their  
442 identity as per key at right. Densitometry of the protein staining of the DMSO (black) and  
443 rapamycin (orange) lanes on right.

444

#### 445 **Figure 5. NPC scaffold integrity affects Heh2's association with NPCs**

446 **(A)** Affinity purifications were performed from cell extracts derived from the indicated nup gene  
447 deletion strains expressing endogenous Heh2-TAP or from WT cells (no TAP). Bound proteins  
448 were separated by SDS-PAGE and visualized by Coomassie staining. Numbers at left indicate  
449 position of MW standards in kD. Proteins are marked with colored circles that denote their  
450 identify as per key at right.



451 **(B)** The nups affinity purified from the indicated genetic backgrounds in A are placed within a  
452 single spoke of the NPC structure (from PDBDEV\_00000010; Kim et al., 2018) in side and  
453 center views. Individual nups are colored as in the key in A.

454 **(C)** As in A but affinity purifications performed from *S. pombe* cell extracts.

455 **(D)** Deconvolved fluorescence micrographs of Heh2-GFP in indicated strain backgrounds. White  
456 arrowhead points to Heh2-GFP fluorescence at the cortical ER in *nup170* $\Delta$  cells. Scale bars are  
457 5  $\mu$ m.

458

### 459 **Figure 6. The WH domain of Heh2 is required for its association with NPCs**

460 **(A)** Schematic of Heh2 and Heh2 truncations showing the LEM (Lap2-Emerin-Man1) domain, a  
461 bipartite nuclear localization signal (NLS), intrinsically disordered region (IDR), luminal domain  
462 (LD), transmembrane domains (TM1 and TM2) and winged helix (WH); numbers represent  
463 amino acid numbers. INM, inner nuclear membrane.

464 **(B)** Affinity purifications were performed from cell extracts derived from strains expressing the  
465 indicated TAP fusions or from WT cells (no TAP). Bound proteins were separated by SDS-  
466 PAGE and visualized by Coomassie staining. Numbers at left indicate position of MW standards  
467 in kD. Red circles denote position of TAP-fusions.

468 **(C)** Deconvolved fluorescence micrographs of Heh2-GFP or *heh2*-(1-570)-GFP and the NPC  
469 marker Nup82-mCherry, with merge. Scale bar is 5  $\mu$ m.

470 **(D)** To quantitatively evaluate the distribution of Heh2-GFP and *heh2*-(1-570)-GFP, a coefficient  
471 of variation (CV) of the GFP fluorescence along the nuclear envelope was calculated. Individual  
472 CV values (multiplied by 100) were plotted with mean and SD from 60 cells, from three  
473 independent experiments. *p* values were calculated from Student's t-test where \*\*\*\* indicates *p*  
474  $\leq$  0.0001.

475 **(E)** Deconvolved fluorescence micrographs of *heh2*-(1-570)-GFP and Nup170-mCherry with  
476 merge in cells expressing Nsp1-FRB and Pma1-FKBP12. Cells were treated with carrier  
477 (DMSO) or rapamycin. Addition of rapamycin leads to NPC clustering as described in Fig. 3A.  
478 Scale bar is 5  $\mu$ m.

479 **(F)** Scatterplot with Pearson correlation coefficient (*r*) of *heh2*-(1-570)-GFP and Nup170-  
480 mCherry fluorescence intensity (in arbitrary units, a.u.) along the nuclear envelope of 30 cells

481 from three independent experiments like that shown in E. Values are from cells from DMSO  
482 (top) and rapamycin-treated (bottom) conditions.

483 **(G)** The WH domain of Heh2 is required for normal NPC distribution. Deconvolved fluorescence  
484 micrographs of Nup82-GFP in indicated strain backgrounds. Scale bar is 5  $\mu$ m.

485 **(H)** To quantitatively evaluate the distribution of Nup82-GFP in the indicated strains, a  
486 coefficient of variation (CV) of the GFP fluorescence along the nuclear envelope was calculated.  
487 Individual CV values (multiplied by 100) were plotted with mean and SD from 60 cells, from  
488 three independent experiments.  $p$  values were calculated from one-way ANOVA with Tukey's  
489 post-hoc test where ns is  $p > 0.05$ , \*\*\*\* $p \leq 0.0001$ .

490 **(I)** Deconvolved fluorescence micrographs of Nup84-GFP in WT and cells where *HEH2* is  
491 replaced by *heh2-(316-663)*. Arrowheads point to cytosolic Nup84-GFP foci. Scale bar is 5  $\mu$ m.

492 **(J)** Quantification of the percentage of cells where Nup84-GFP is found in the cytosol from  
493 experiment in I. Error bars are SD from four independent experiments.  $p$  values were calculated  
494 with unpaired t-test where \*\* indicates  $p \leq 0.01$ .

495

496

497

498

499

500

501

502

503

504

505

506

507

## 508 **Materials and methods**

### 509 **Yeast culture and strain generation**

510 All yeast strains used in this study are listed in Table S1. *S. cerevisiae* strains were grown in  
511 YPD consisting of 1% Yeast extract (BD), 2% Bacto-peptone (BD) and, 2% D-glucose (Sigma).  
512 For microscopy experiments, YPD was supplemented with 0.025% adenine hemi-sulfate  
513 (Sigma). Yeast cells were grown at 30°C to mid-log phase, unless otherwise stated.

514 Transformation of *S. cerevisiae* cells, mating, sporulation and tetrad-dissections were carried  
515 out using standard protocols (Amberg et al., 2005). Deletion and truncation of yeast ORFs and  
516 tagging of ORFs with fluorescent protein genes, FRB and TAP-tags was performed utilizing the  
517 pFA6a or pK3F plasmid templates (Longtine et al., 1998; Zhang et al., 2017).

518 *S. pombe* strains were grown in YE5S media consisting of 5% Yeast extract (BD), 30% D-  
519 glucose (Sigma) and 1.25% SP complete supplements (adenine hemisulfate, L-histidine  
520 hydrochloride monohydrate, L-leucine, L-lysine hydrochloride and uracil) from Sunrise Science  
521 products, at 30°C. *S. pombe* strains were crossed and maintained utilizing standard media and  
522 techniques as described in (Moreno et al., 1991). PCR based gene disruption and tagging were  
523 performed utilizing pFA6a plasmid templates (Bähler et al., 1998; Hentges et al., 2005).

524

### 525 **Plasmids**

526 All plasmids used in this study are listed in Table S2. The pFA6a-TAP-his3MX6 and pFA6a-  
527 TAP-TRP1 plasmids were constructed as follows: the TAP coding sequence was PCR-amplified  
528 from chromosomal DNA from a strain expressing Heh2-TAP (SBCPL42, Dharmacon yeast  
529 resources) using Phusion High fidelity DNA polymerase (New England BioLabs) and cloned into  
530 the *PacI* and *AscI* sites of pFA6a-his3MX6 and pFA6a-TRP1.

531 pFA6a-3xHA-FRB-GFP-his3MX6 was generated by Gibson Assembly (New England BioLabs).  
532 The 3xHA epitope coding sequence was PCR-amplified from pFA6a-3xHA-hisMX6 (Longtine et  
533 al., 1998) using Q5 DNA polymerase (New England BioLabs) and assembled into pFA6a-FRB-  
534 GFP-hisMX6, or pFA6a-FRB-hisMX6 (EUROSCARF) digested with *Sall* and *PacI*.

535

### 536 **Immunoaffinity purification**

537 To affinity purify TAP-fusions, *S. cerevisiae* strains were grown overnight and 2 ml of culture  
538 was diluted into 1 l of YPD the next morning and grown for 20-24 h to late log phase ( $OD_{600} \sim 2$ ).  
539 *S. pombe* cells were grown overnight and transferred to fresh medium the next morning to an  
540  $OD_{600}$  of 0.1 and grown for 7 h. *S. pombe* cells were further diluted to an  $OD_{600}$  of 0.01 in 1 l  
541 YES medium and grown for another 18-20 h. Both *S. cerevisiae* and *S. pombe* cells were grown  
542 at 30°C at 200 rpm and cells were harvested by centrifugation. Cells were washed with ice-cold  
543 water once, collected by centrifugation and resuspended in 100  $\mu$ l freezing solution (20 mM  
544 HEPES, pH 7.4, 1.2% polyvinylpyrrolidone and protease inhibitor cocktail [Sigma]) per g of cells.  
545 The cell slurry was snap-frozen in liquid nitrogen immediately. The frozen cell pellets were cryo-  
546 milled 6 times at 30 Hz for 3 min in a Retsch MM400 mixer mill and stored at -80°C.

547 To perform immunoaffinity purifications, 200 mg of frozen yeast grindate was resuspended in 4-  
548 times volume of homogenization buffer (400 mM  $Na_3Cit$ , pH 8.0, 10 mM Deoxy Big CHAP) and  
549 protease inhibitor cocktail at room temperature. The homogenate was clarified by centrifugation  
550 at 16,000 g for 10 min at 4°C. The soluble fraction was incubated with 25  $\mu$ l of Rabbit-IgG  
551 coated Dynabeads for 1 h at 4°C under gentle rotation. After binding, beads were collected on a  
552 magnetic rack and washed three times with 500  $\mu$ l ice-cold homogenization buffer. The proteins  
553 were eluted by incubating beads with 20  $\mu$ l of 1X NuPAGE lithium dodecyl sulfate sample buffer  
554 (Invitrogen) at room temperature for 10 min. The eluate was separated on a magnetic rack and  
555 further incubated with 50 mM DTT at 70°C for 10 min. The eluted proteins were separated on a  
556 4–12% NuPAGE gel (Novex) and stained with Imperial protein stain (Thermo Scientific). The  
557 proteins of interest were excised for identification by MS.

### 558 **Conjugation of Dynabeads with Rabbit IgG**

559 Purified rabbit IgG (Sigma, I5006) was dissolved in 0.1 M sodium phosphate buffer, pH 7.4, to a  
560 final concentration of 1 mg/ml. The IgG solution was filtered through a 0.22  $\mu$ m syringe filter and  
561 mixed with an equal volume of 3 M  $(NH_4)_2SO_4$ . For conjugation, 100 mg of Dynabeads® M-270  
562 Epoxy (Invitrogen) were transferred to a 15 ml centrifuge tube, suspended in 6 ml 0.1 M sodium  
563 phosphate buffer, pH 7.4 and incubated at room temperature for 15 min on a tube rotator. The  
564 beads were collected on a magnetic rack, the buffer aspirated and beads were washed again  
565 with 0.1 M sodium phosphate buffer, pH 7.4 by vortexing. The buffer was removed and beads  
566 were resuspended in 2 ml of IgG solution and incubated at 30°C for 65-70 h on a tube rotator.  
567 The beads were separated on a magnetic rack and quickly washed with 100 mM glycine, pH  
568 2.5, followed by a wash with 10 mM Tris-HCl, pH 8.8. Beads were again washed quickly with  
569 freshly prepared 100 mM Triethylamine and followed by 4 washes with PBS for 5 min each and

570 one wash with PBS with 0.5% Triton X-100 for 15 min. The beads were washed one final time  
571 with PBS, collected on a magnetic rack and resuspended in 667µl PBS with 50% glycerol.

## 572 **Anchor-away experiments**

573 The anchor-away experiments were performed as described by Haruki et al., 2008. Briefly,  
574 strains expressing Nup-FRB fusions and Pma1-FKPB12 in HHY110 (*tor1-1 fpr1Δ*) were  
575 incubated with a final concentration of 1 µg/ml rapamycin for 30 min (to cluster NPCs in the  
576 context of Nsp1-FRB) or 3 h to inhibit assembly (Nup192-FRB).

## 577 **Fluorescence microscopy, image processing and analysis**

578 Fluorescence micrographs were acquired on a DeltaVision microscope (Applied Precision, GE  
579 Healthcare) with a 100x, 1.4 NA objective (Olympus). The images were captured with a  
580 CoolSnapHQ<sup>2</sup> CCD camera (Photometrics). Fluorescence micrographs were deconvolved with  
581 the iterative algorithm sofWoRx. 6.5.1 (Applied Precision, GE Healthcare).

582 Clustering of NPCs was quantified as described previously (FernandezMartinez et al., 2012): A  
583 6-pixel wide freehand line was drawn along the nuclear envelope contour and mean  
584 fluorescence intensities were measured using FIJI/ImageJ (Schindelin et al., 2012). Clustering  
585 was assessed by calculating the coefficient of variance (SD/mean X 100) of the fluorescence  
586 intensities at the nuclear envelope.

## 587 **Modeling of NPC spokes**

588 Color coding of an isosurface representation of individual nup densities as assigned in Kim et al.  
589 2018 within an individual spoke of the NPC from the PDB DEV ID:00000010 was completed  
590 using ChimeraX (UCSF) (Goddard et al., 2018).

591

592 **Acknowledgements**

593 We thank Jean Kanyo and the Yale Keck Biotechnology Resource Laboratory for help with MS  
594 analysis. We would like to thank for Valérie Doye for *S. pombe* strains. We would like to thank  
595 the members of the Lusk and King laboratories for critical input on experimental design and data  
596 analysis. This work was supported by the NIH: R01 GM105672 to CPL, R21 HG006742 to CPL  
597 and MCK, and R01 GM112108 and P41 GM109824 to MPR and the NSF: EFMA-1806504 to  
598 MCK.

599 **References**

- 600 Aitchison, J.D., G. Blobel, and M.P. Rout. 1995. Nup120p: a yeast nucleoporin required for NPC  
601 distribution and mRNA transport. *J. Cell Biol.* 131:1659–1675. doi:10.1083/jcb.131.6.1659.
- 602 Amberg, D.C., D.J. Burke, and J.N.J.N. Strathern. 2005. *Methods in Yeast Genetics: A Cold*  
603 *Spring Harbor Laboratory Course Manual, 2005 Edition.* 2005 ed. Cold Spring Harbor  
604 Laboratory Press.
- 605 von Appen, A., D. LaJoie, I.E. Johnson, M.J. Trnka, S.M. Pick, A.L. Burlingame, K.S. Ullman,  
606 and A. Frost. 2020. LEM2 phase separation promotes ESCRT-mediated nuclear envelope  
607 reformation. *Nature.* 582. doi:10.1038/s41586-020-2232-x.
- 608 Asakawa, H., T. Kojidani, H.J. Yang, C. Ohtsuki, H. Osakada, A. Matsuda, M. Iwamoto, Y.  
609 Chikashige, K. Nagao, C. Obuse, Y. Hiraoka, and T. Haraguchi. 2019. Asymmetrical  
610 localization of nup107-160 subcomplex components within the nuclear pore complex in  
611 fission yeast. *PLoS Genet.* 15:1–30. doi:10.1371/journal.pgen.1008061.
- 612 Asakawa, H., H.J. Yang, T.G. Yamamoto, C. Ohtsuki, Y. Chikashige, K. Sakata-Sogawa, M.  
613 Tokunaga, M. Iwamoto, Y. Hiraoka, and T. Haraguchi. 2014. Characterization of nuclear  
614 pore complex components in fission yeast *Schizosaccharomyces pombe*. *Nucl. (United*  
615 *States).* 5. doi:10.4161/nucl.28487.
- 616 Bähler, J., J.Q. Wu, M.S. Longtine, N.G. Shah, A. McKenzie, A.B. Steever, A. Wach, P.  
617 Philippsen, and J.R. Pringle. 1998. Heterologous modules for efficient and versatile PCR-  
618 based gene targeting in *Schizosaccharomyces pombe*. *Yeast.* 14:943–951.  
619 doi:10.1002/(SICI)1097-0061(199807)14:10<943::AID-YEA292>3.0.CO;2-Y.
- 620 Baï, S.W., J. Rouquette, M. Umeda, W. Faigle, D. Loew, S. Sazer, and V. Doye. 2004. The  
621 Fission Yeast Nup107-120 Complex Functionally Interacts with the Small GTPase  
622 Ran/Spi1 and Is Required for mRNA Export, Nuclear Pore Distribution, and Proper Cell  
623 Division. *Mol. Cell. Biol.* 24:6379–6392. doi:10.1128/mcb.24.14.6379-6392.2004.
- 624 Barrales, R.R., M. Forn, P.R. Georgescu, Z. Sarkadi, and S. Braun. 2016. Control of  
625 heterochromatin localization and silencing by the nuclear membrane protein Lem2. *Genes*  
626 *Dev.* 30:133–148. doi:10.1101/gad.271288.115.
- 627 Barton, L.J., A.A. Soshnev, and P.K. Geyer. 2015. Networking in the nucleus: a spotlight on  
628 LEM-domain proteins. *Curr. Opin. Cell Biol.* 34:1–8.

- 629           doi:<https://doi.org/10.1016/j.ceb.2015.03.005>.
- 630 Belgareh, N., and V. Doye. 1997. Dynamics of nuclear pore distribution in nucleoporin mutant  
631 yeast cells. *J. Cell Biol.* 136:747–759. doi:10.1083/jcb.136.4.747.
- 632 Bucci, M., and S.R. Wentz. 1997. In vivo dynamics of nuclear pore complexes in yeast. *J. Cell*  
633 *Biol.* 136:1185–99.
- 634 Buchwalter, A., J.M. Kaneshiro, and M.W. Hetzer. 2019. Coaching from the sidelines: the  
635 nuclear periphery in genome regulation. *Nat. Rev. Genet.* 20:39–50. doi:10.1038/s41576-  
636 018-0063-5.
- 637 Burke, B., and K.J. Roux. 2009. Nuclei Take a Position: Managing Nuclear Location. *Dev. Cell.*  
638 17:587–597. doi:10.1016/j.devcel.2009.10.018.
- 639 Cai, M., Y. Huang, J.-Y. Suh, J.M. Louis, R. Ghirlando, R. Craigie, and G.M. Clore. 2007.  
640 Solution NMR structure of the barrier-to-autointegration factor-Emerin complex. *J. Biol.*  
641 *Chem.* 282:14525–14535. doi:10.1074/jbc.M700576200.
- 642 Capelson, M., C. Doucet, and M.W. Hetzer. 2010. Nuclear pore complexes: guardians of the  
643 nuclear genome. *Cold Spring Harb. Symp. Quant. Biol.* 75:585–597.  
644 doi:10.1101/sqb.2010.75.059.
- 645 Caputo, S., J. Couprie, I. Duband-Goulet, E. Kondé, F. Lin, S. Braud, M. Gondry, B. Gilquin,  
646 H.J. Worman, and S. Zinn-Justin. 2006. The carboxyl-terminal nucleoplasmic region of  
647 MAN1 exhibits a DNA binding winged helix domain. *J. Biol. Chem.* 281:18208–18215.  
648 doi:10.1074/jbc.M601980200.
- 649 Chen, X.Q., X. Du, J. Liu, M.K. Balasubramanian, and D. Balasundaram. 2004. Identification of  
650 genes encoding putative nucleoporins and transport factors in the fission yeast  
651 *Schizosaccharomyces pombe*: a deletion analysis. *Yeast.* 21:495–509.  
652 doi:10.1002/yea.1115.
- 653 Colombi, P., B.M. Webster, F. Fröhlich, and C. Patrick Lusk. 2013. The transmission of nuclear  
654 pore complexes to daughter cells requires a cytoplasmic pool of Nsp1. *J. Cell Biol.*  
655 203:215–232. doi:10.1083/jcb.201305115.
- 656 Daigle, N., J. Beaudouin, L. Hartnell, G. Imreh, E. Hallberg, J. Lippincott-Schwartz, and J.  
657 Ellenberg. 2001. Nuclear pore complexes form immobile networks and have a very low  
658 turnover in live mammalian cells. *J. Cell Biol.* 154:71–84. doi:10.1083/jcb.200101089.



- 659 Doye, V., R. Wepf, and E.C. Hurt. 1994. A novel nuclear pore protein Nup133p with distinct  
660 roles in poly(A)<sup>+</sup> RNA transport and nuclear pore distribution. *EMBO J.* 13:6062–6075.
- 661 Drin, G., J.F. Casella, R. Gautier, T. Boehmer, T.U. Schwartz, and B. Antony. 2007. A general  
662 amphipathic  $\alpha$ -helical motif for sensing membrane curvature. *Nat. Struct. Mol. Biol.*  
663 14:138–146. doi:10.1038/nsmb1194.
- 664 Fernandez-Martinez, J., J. Phillips, M.D. Sekedat, R. Diaz-Avalos, J. Velazquez-Muriel, J.D.  
665 Franke, R. Williams, D.L. Stokes, B.T. Chait, A. Sali, and M.P. Rout. 2012. Structure-  
666 function mapping of a heptameric module in the nuclear pore complex. *J. Cell Biol.*  
667 196:419–434. doi:10.1083/jcb.201109008.
- 668 Furukawa, K. 1999. LAP2 binding protein 1 (L2BP1/BAF) is a candidate mediator of LAP2-  
669 chromatin interaction. *J. Cell Sci.* 112:2485–2492.
- 670 Goddard, T.D., C.C. Huang, E.C. Meng, E.F. Pettersen, G.S. Couch, J.H. Morris, and T.E.  
671 Ferrin. 2018. UCSF ChimeraX: Meeting modern challenges in visualization and analysis.  
672 *Protein Sci.* 27:14–25. doi:10.1002/pro.3235.
- 673 Gonzalez, Y., A. Saito, and S. Sazer. 2012. Fission yeast Lem2 and Man1 perform fundamental  
674 functions of the animal cell nuclear lamina. *Nucleus.* 3:60–76. doi:10.4161/nucl.18824.
- 675 Grund, S.E., T. Fischer, G.G. Cabal, O. Antúnez, J.E. Pérez-Ortín, and E. Hurt. 2008. The inner  
676 nuclear membrane protein Src1 associates with subtelomeric genes and alters their  
677 regulated gene expression. *J. Cell Biol.* 182:897–910. doi:10.1083/jcb.200803098.
- 678 Hakhverdyan, Z., M. Domanski, L.E. Hough, A.R.A.A. Oroskar, A.R.A.A. Oroskar, S. Keegan,  
679 D.J. Dilworth, K.R. Molloy, V. Sherman, J.D. Aitchison, D. Fenyö, B.T. Chait, T.H. Jensen,  
680 M.P. Rout, and J. Lacava. 2015. Rapid, optimized interactomic screening. *Nat. Methods.*  
681 12:553–560. doi:10.1038/nmeth.3395.
- 682 Hampoelz, B., A. Andres-Pons, P. Kastritis, and M. Beck. 2019. Structure and Assembly of the  
683 Nuclear Pore Complex. *Annu. Rev. Biophys.* 48:515–536. doi:10.1146/annurev-biophys-  
684 052118-115308.
- 685 Haruki, H., J. Nishikawa, and U.K. Laemmli. 2008. The Anchor-Away Technique: Rapid,  
686 Conditional Establishment of Yeast Mutant Phenotypes. *Mol. Cell.* 31:925–932.  
687 doi:10.1016/j.molcel.2008.07.020.
- 688 Heath, C. V., C.S. Copeland, D.C. Amberg, V. Del Priore, M. Snyder, and C.N. Cole. 1995.

- 689 Nuclear pore complex clustering and nuclear accumulation of poly(A)<sup>+</sup> RNA associated  
690 with mutation of the *Saccharomyces cerevisiae* RAT2/NUP120 gene. *J. Cell Biol.*  
691 131:1677–1697. doi:10.1083/jcb.131.6.1677.
- 692 Hentges, P., B. Van Driessche, L. Tafforeau, J. Vandenhaute, and A.M. Carr. 2005. Three novel  
693 antibiotic marker cassettes for gene disruption and marker switching in  
694 *Schizosaccharomyces pombe*. *Yeast*. 22:1013–1019. doi:10.1002/yea.1291.
- 695 Hirano, Y., Y. Kinugasa, H. Asakawa, Y. Chikashige, C. Obuse, T. Haraguchi, and Y. Hiraoka.  
696 2018. Lem2 is retained at the nuclear envelope through its interaction with Bqt4 in fission  
697 yeast. *Genes to Cells*. 23:122–135. doi:10.1111/gtc.12557.
- 698 Kim, S.J., J. Fernandez-Martinez, I. Nudelman, Y. Shi, W. Zhang, B. Raveh, T. Herricks, B.D.  
699 Slaughter, J.A. Hogan, P. Upla, I.E. Chemmama, R. Pellarin, I. Echeverria, M. Shivaraju,  
700 A.S. Chaudhury, J. Wang, R. Williams, J.R. Unruh, C.H. Greenberg, E.Y. Jacobs, Z. Yu,  
701 M.J. De La Cruz, R. Mironska, D.L. Stokes, J.D. Aitchison, M.F. Jarrold, J.L. Gerton, S.J.  
702 Ludtke, C.W. Akey, B.T. Chait, A. Sali, and M.P. Rout. 2018. Integrative structure and  
703 functional anatomy of a nuclear pore complex. *Nature*. 555:475–482.  
704 doi:10.1038/nature26003.
- 705 King, M.C., C.P. Lusk, and G. Blobel. 2006. Karyopherin-mediated import of integral inner  
706 nuclear membrane proteins. *Nature*. 442:1003–1007. doi:10.1038/nature05075.
- 707 Kittisopikul, M., T. Shimi, M. Tatli, J.R. Tran, Y. Zheng, O. Medalia, K. Jaqaman, S.A. Adam,  
708 and R.D. Goldman. 2020. Nuclear Lamins A/C and B1 Provide a Structural Framework  
709 That Organizes and Anchors Nuclear Pore Complexes. *bioRxiv*. 2020.04.03.022798.  
710 doi:10.1101/2020.04.03.022798.
- 711 Kosinski, J., S. Mosalaganti, A. von Appen, R. Teimer, A.L. DiGuilio, W. Wan, K.H. Bui, W.J.H.  
712 Hagen, J.A.G. Briggs, J.S. Glavy, E. Hurt, and M. Beck. 2016. Molecular architecture of the  
713 inner ring scaffold of the human nuclear pore complex. *Science*. 352:363–365.  
714 doi:10.1126/science.aaf0643.
- 715 Lee, C.W., F. Wilfling, P. Ronchi, M. Allegretti, S. Mosalaganti, S. Jentsch, M. Beck, and B.  
716 Pfander. 2020. Selective autophagy degrades nuclear pore complexes. *Nat. Cell Biol.*  
717 22:159–166. doi:10.1038/s41556-019-0459-2.
- 718 Li, O., C. V Heath, D.C. Amberg, T.C. Dockendorff, C.S. Copeland, M. Snyder, and C.N. Cole.  
719 1995. Mutation or deletion of the *Saccharomyces cerevisiae* RAT3/NUP133 gene causes

- 720 temperature-dependent nuclear accumulation of poly(A)<sup>+</sup> RNA and constitutive clustering  
721 of nuclear pore complexes. *Mol. Biol. Cell.* 6:401–417. doi:10.1091/mbc.6.4.401.
- 722 Longtine, M.S., A. McKenzie, D.J. Demarini, N.G. Shah, A. Wach, A. Brachat, P. Philippsen,  
723 and J.R. Pringle. 1998. Additional modules for versatile and economical PCR-based gene  
724 deletion and modification in *Saccharomyces cerevisiae*. *Yeast.* 14:953–961.  
725 doi:10.1002/(SICI)1097-0061(199807)14:10<953::AID-YEA293>3.0.CO;2-U.
- 726 Luthra, R., S.C. Kerr, M.T. Harreman, L.H. Apponi, M.B. Fasken, S. Ramineni, S. Chaurasia,  
727 S.R. Valentini, and A.H. Corbett. 2007. Actively transcribed GAL genes can be physically  
728 linked to the nuclear pore by the SAGA chromatin modifying complex. *J. Biol. Chem.*  
729 282:3042–3049. doi:10.1074/jbc.M608741200.
- 730 Maeshima, K., K. Yahata, Y. Sasaki, R. Nakatomi, T. Tachibana, T. Hashikawa, F. Imamoto,  
731 and N. Imamoto. 2006. Cell-cycle-dependent dynamics of nuclear pores: Pore-free islands  
732 and lamins. *J. Cell Sci.* 119:4442–4451. doi:10.1242/jcs.03207.
- 733 Makio, T., L.H. Stanton, C.C. Lin, D.S. Goldfarb, K. Weis, and R.W. Wozniak. 2009. The  
734 nucleoporins Nup170p and Nup157p are essential for nuclear pore complex assembly. *J.*  
735 *Cell Biol.* 185:459–473. doi:10.1083/jcb.200810029.
- 736 Mans, B.J., V. Anantharaman, L. Aravind, and E. V. Koonin. 2004. Comparative genomics,  
737 evolution and origins of the nuclear envelope and nuclear pore complex. *Cell Cycle.*  
738 3:1625–1650. doi:10.4161/cc.3.12.1316.
- 739 Marelli, M., C.P. Lusk, H. Chan, J.D. Aitchison, and R.W. Wozniak. 2001. A link between the  
740 synthesis of nucleoporins and the biogenesis of the nuclear envelope. *J. Cell Biol.*  
741 153:709–724. doi:10.1083/jcb.153.4.709.
- 742 Meinema, A.C., J.K. Laba, R.A. Hapsari, R. Otten, F.A.A. Mulder, A. Kralt, G. Van Den Bogaart,  
743 C.P. Lusk, B. Poolman, and L.M. Veenhoff. 2011. Long unfolded linkers facilitate  
744 membrane protein import through the nuclear pore complex. *Science (80-. ).* 333:90–93.  
745 doi:10.1126/science.1205741.
- 746 Mekhail, K., and D. Moazed. 2010. The nuclear envelope in genome organization, expression  
747 and stability. *Nat. Rev. Mol. Cell Biol.* 11:317–328. doi:10.1038/nrm2894.
- 748 Mekhail, K., J. Seebacher, S.P. Gygi, and D. Moazed. 2008. Role for perinuclear chromosome  
749 tethering in maintenance of genome stability. *Nature.* 456:667–670.

- 750           doi:10.1038/nature07460.
- 751   Mészáros, N., J. Cibulka, M.J. Mendiburo, A. Romanauska, M. Schneider, and A. Köhler. 2015.  
752           Nuclear pore basket proteins are tethered to the nuclear envelope and can regulate  
753           membrane curvature. *Dev. Cell.* 33:285–298. doi:10.1016/j.devcel.2015.02.017.
- 754   Moreno, S., A. Klar, and P. Nurse. 1991. Molecular genetic analysis of fission yeast  
755           *Schizosaccharomyces pombe*. *Methods Enzymol.* 194:795–823. doi:10.1016/0076-  
756           6879(91)94059-I.
- 757   Onischenko, E., J.H. Tang, K.R. Andersen, K.E. Knockenhauer, P. Vallotton, C.P. Derrer, A.  
758           Kralt, C.F. Mugler, L.Y. Chan, T.U. Schwartz, and K. Weis. 2017. Natively Unfolded FG  
759           Repeats Stabilize the Structure of the Nuclear Pore Complex. *Cell.* 171:904-917.e19.  
760           doi:10.1016/j.cell.2017.09.033.
- 761   Otsuka, S., K.H. Bui, M. Schorb, M. Julius Hossain, A.Z. Politi, B. Koch, M. Eltsov, M. Beck, and  
762           J. Ellenberg. 2016. Nuclear pore assembly proceeds by an inside-out extrusion of the  
763           nuclear envelope. *Elife.* 5:1–23. doi:10.7554/eLife.19071.
- 764   Pemberton, L.F., M.P. Rout, and G. Blobel. 1995. Disruption of the nucleoporin gene NUP133  
765           results in clustering of nuclear pore complexes. *Proc. Natl. Acad. Sci. U. S. A.* 92:1187–  
766           1191. doi:10.1073/pnas.92.4.1187.
- 767   Raices, M., and M.A. D’Angelo. 2017. Nuclear pore complexes and regulation of gene  
768           expression. *Curr. Opin. Cell Biol.* 46:26–32. doi:https://doi.org/10.1016/j.ceb.2016.12.006.
- 769   Rhind, N., Z. Chen, M. Yassour, D.A. Thompson, B.J. Haas, N. Habib, I. Wapinski, S. Roy, M.F.  
770           Lin, D.I. Heiman, S.K. Young, K. Furuya, Y. Guo, A. Pidoux, H.M. Chen, B. Robbertse, J.M.  
771           Goldberg, K. Aoki, E.H. Bayne, A.M. Berlin, C.A. Desjardins, E. Dobbs, L. Dukaj, L. Fan,  
772           M.G. FitzGerald, C. French, S. Gujja, K. Hansen, D. Keifenheim, J.Z. Levin, R.A. Mosher,  
773           C.A. Müller, J. Pfiffner, M. Priest, C. Russ, A. Smialowska, P. Swoboda, S.M. Sykes, M.  
774           Vaughn, S. Vengrova, R. Yoder, Q. Zeng, R. Allshire, D. Baulcombe, B.W. Birren, W.  
775           Brown, K. Ekwall, M. Kellis, J. Leatherwood, H. Levin, H. Margalit, R. Martienssen, C.A.  
776           Nieduszynski, J.W. Spatafora, N. Friedman, J.Z. Dalgaard, P. Baumann, H. Niki, A. Regev,  
777           and C. Nusbaum. 2011. Comparative functional genomics of the fission yeasts. *Science*  
778           (80-. ). 332:930–936. doi:10.1126/science.1203357.
- 779   Schreiner, S.M., P.K. Koo, Y. Zhao, S.G.J. Mochrie, and M.C. King. 2015. The tethering of  
780           chromatin to the nuclear envelope supports nuclear mechanics. *Nat. Commun.* 6:1–13.

- 781           doi:10.1038/ncomms8159.
- 782   Steglich, B., G.J. Fillion, B. van Steensel, and K. Ekwall. 2012. The inner nuclear membrane  
783           proteins Man1 and Ima1 link to two different types of chromatin at the nuclear periphery in  
784           *S. pombe*. *Nucleus*. 3:77–87. doi:10.4161/nucl.18825.
- 785   Taddei, A., and S.M. Gasser. 2012. Structure and function in the budding yeast nucleus.  
786           *Genetics*. 192:107–129. doi:10.1534/genetics.112.140608.
- 787   Tan-Wong, S.M., H.D. Wijayatilake, and N.J. Proudfoot. 2009. Gene loops function to maintain  
788           transcriptional memory through interaction with the nuclear pore complex. *Genes Dev*.  
789           23:2610–2624. doi:10.1101/gad.1823209.
- 790   Thaller, D.J., M. Allegretti, S. Borah, P. Ronchi, M. Beck, and C.P. Lusk. 2019. An escrt-lem  
791           protein surveillance system is poised to directly monitor the nuclear envelope and nuclear  
792           transport system. *Elife*. 8. doi:10.7554/eLife.45284.
- 793   Thaller, D.J., and C. Patrick Lusk. 2018. Fantastic nuclear envelope herniations and where to  
794           find them. *Biochem. Soc. Trans.* 46:877–889. doi:10.1042/BST20170442.
- 795   Ungricht, R., and U. Kutay. 2015. Establishment of NE asymmetry—targeting of membrane  
796           proteins to the inner nuclear membrane. *Curr. Opin. Cell Biol.* 34:135—141.  
797           doi:10.1016/j.ceb.2015.04.005.
- 798   Ungricht, R., and U. Kutay. 2017. Mechanisms and functions of nuclear envelope remodelling.  
799           *Nat. Rev. Mol. Cell Biol.* 18:229–245. doi:10.1038/nrm.2016.153.
- 800   Webster, B.M., P. Colombi, J. Jäger, and C. Patrick Lusk. 2014. Surveillance of nuclear pore  
801           complex assembly by ESCRT-III/Vps4. *Cell*. 159:388–401. doi:10.1016/j.cell.2014.09.012.
- 802   Webster, B.M., D.J. Thaller, J. Jäger, S.E. Ochmann, S. Borah, and C.P. Lusk. 2016. Chm7 and  
803           Heh1 collaborate to link nuclear pore complex quality control with nuclear envelope  
804           sealing. *EMBO J*. 35. doi:10.15252/embj.201694574.
- 805   Xie, W., and B. Burke. 2017. Nuclear networking. *Nucleus*. 8:323–330.  
806           doi:10.1080/19491034.2017.1296616.
- 807   Yam, C., Y. Gu, and S. Oliferenko. 2013. Partitioning and remodeling of the  
808           Schizosaccharomyces japonicus mitotic nucleus require chromosome tethers. *Curr. Biol*.  
809           23:2303–2310. doi:10.1016/j.cub.2013.09.057.

- 810 Yewdell, W.T., P. Colombi, T. Makhnevych, and C.P. Lusk. 2011. Luminal interactions in  
811 nuclear pore complex assembly and stability. *Mol. Biol. Cell.* 22:1375–1388.  
812 doi:10.1091/mbc.E10-06-0554.
- 813 Zhang, Y., N.D. Serratore, and S.D. Briggs. 2017. N-ICE plasmids for generating N-terminal 3 ×  
814 FLAG tagged genes that allow inducible, constitutive or endogenous expression in  
815 *Saccharomyces cerevisiae*. *Yeast.* 34:223–235. doi:10.1002/yea.3226.
- 816

## Borah et al., Figure 1

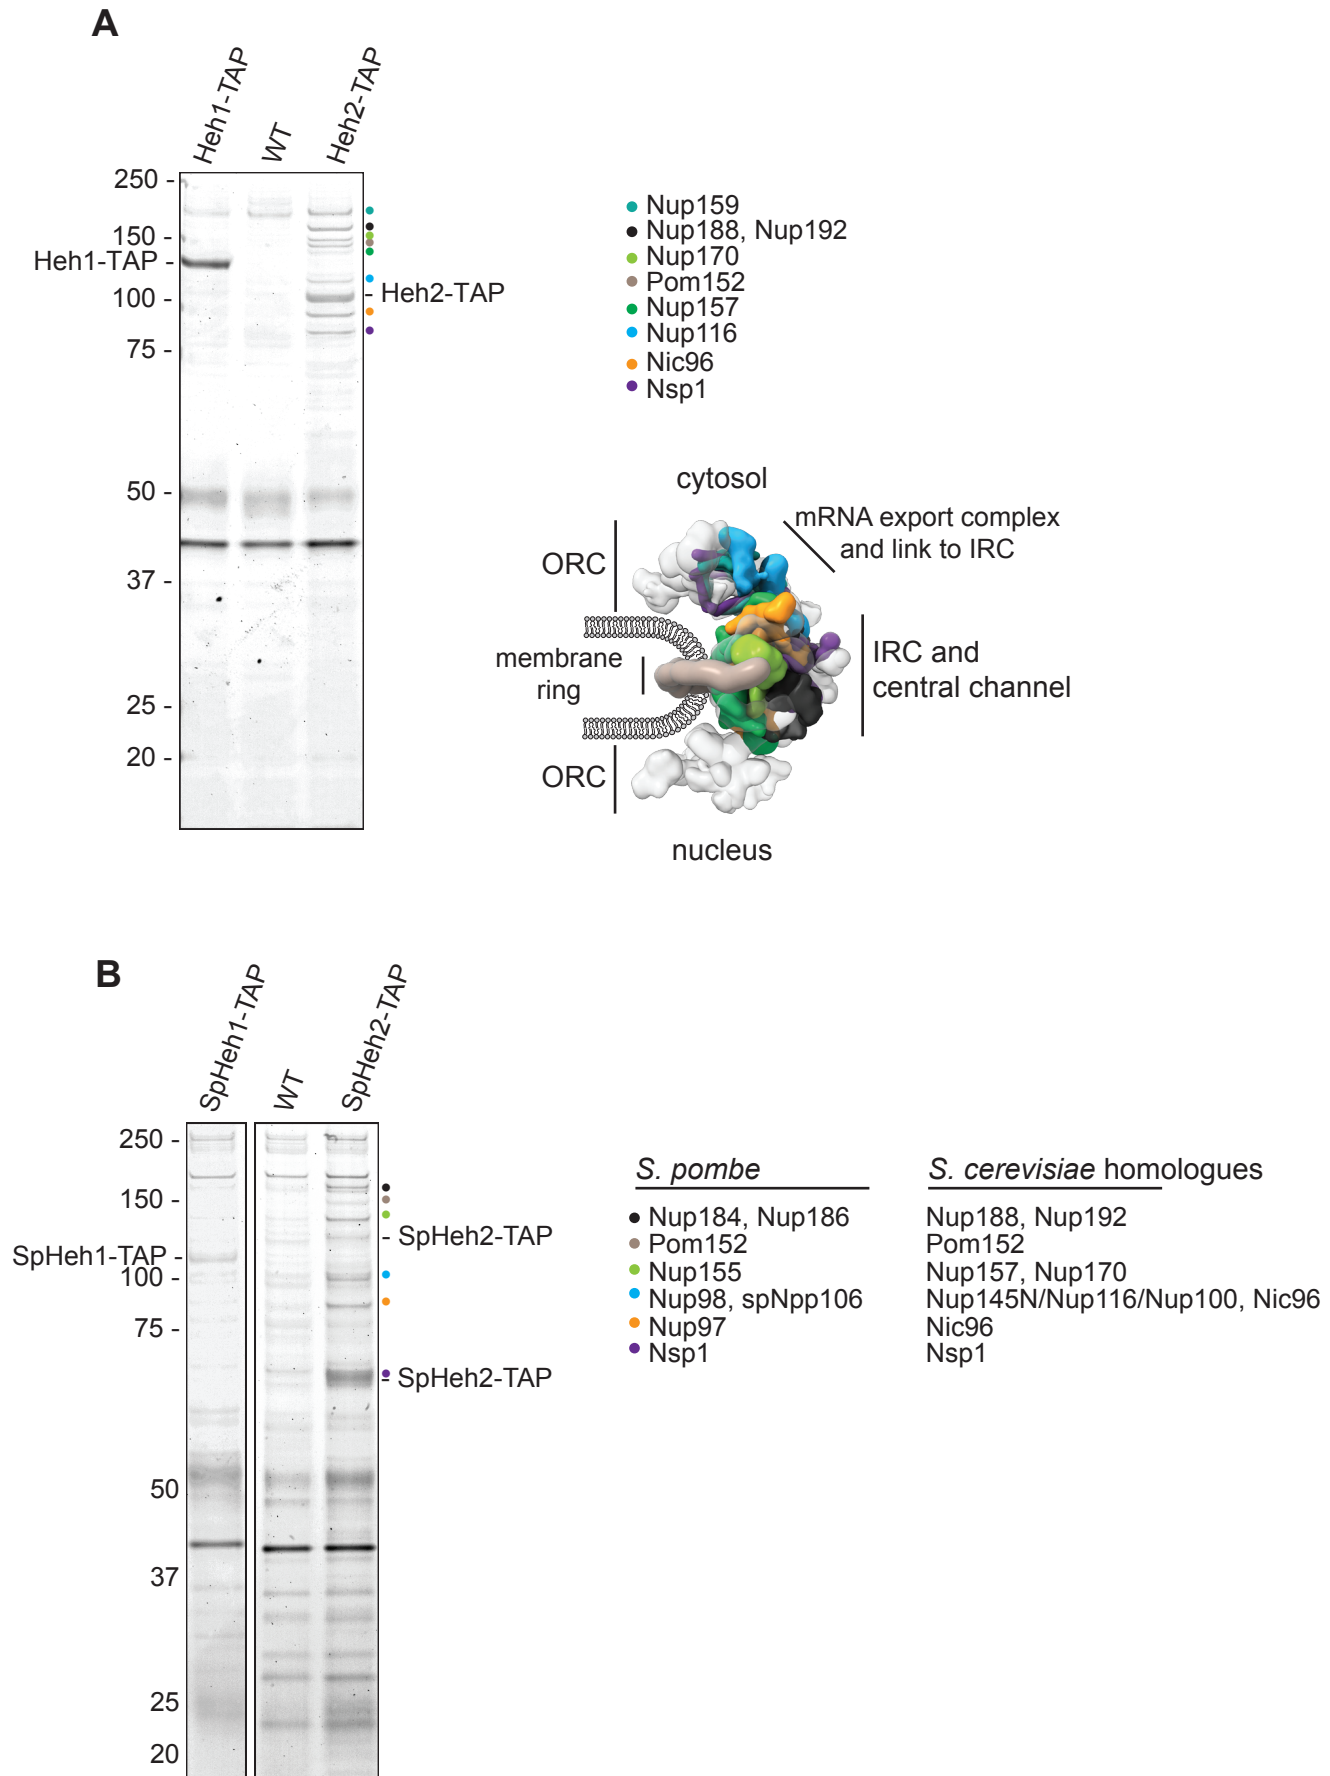

## Borah et al., Figure 2

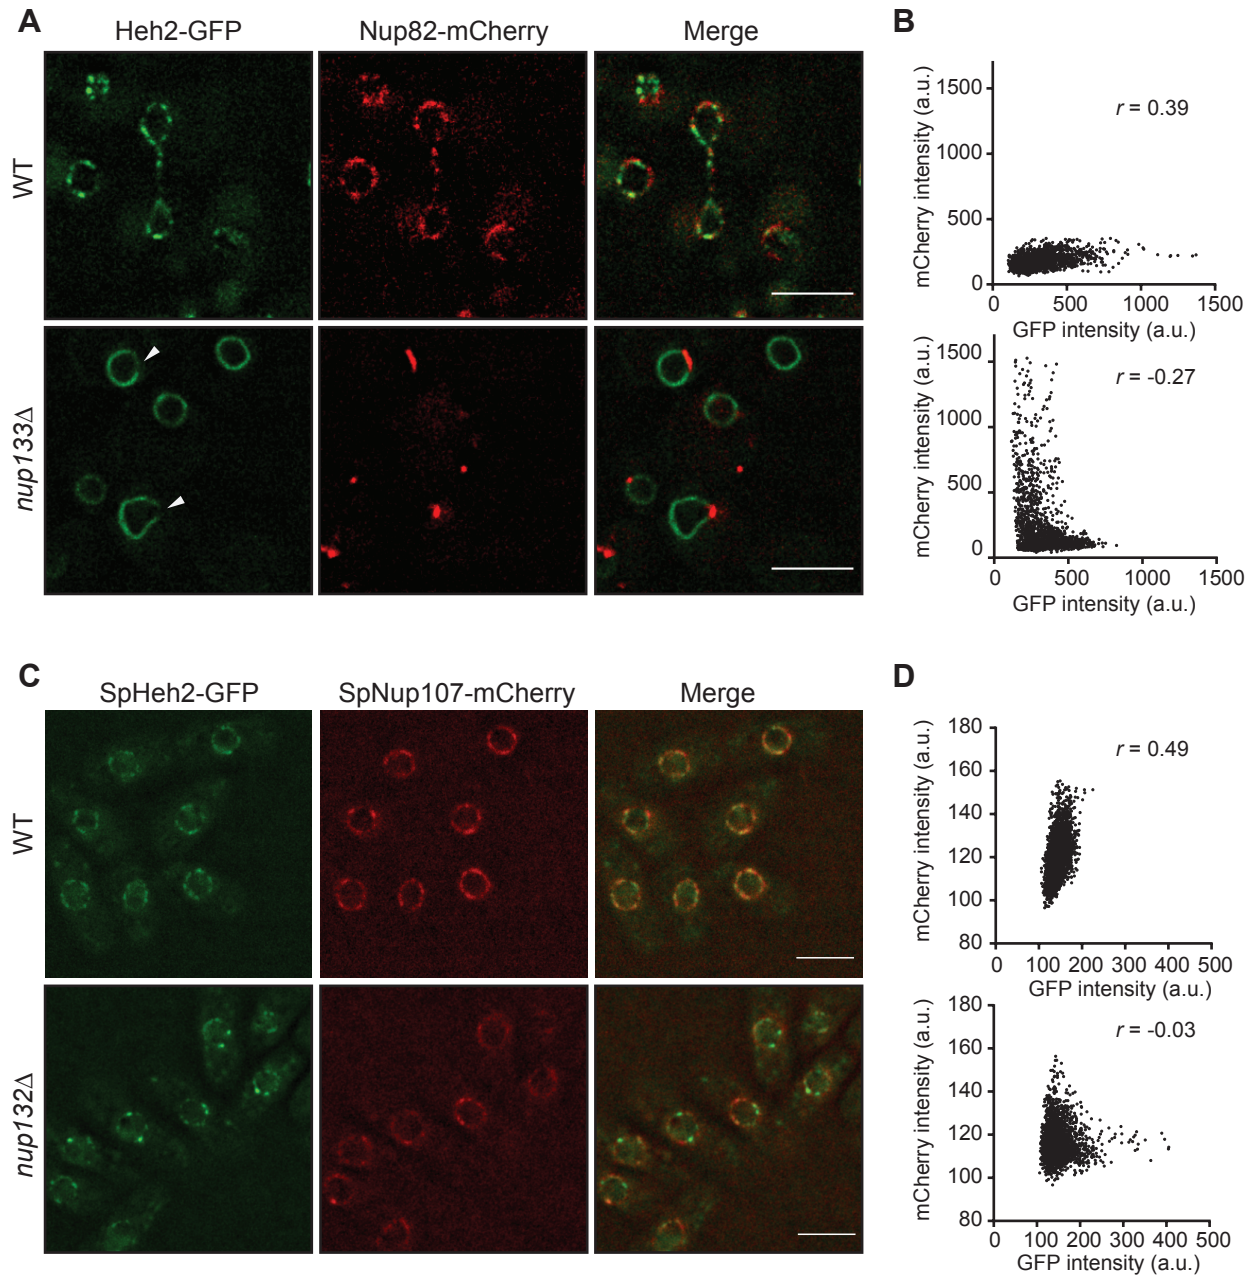



**A**

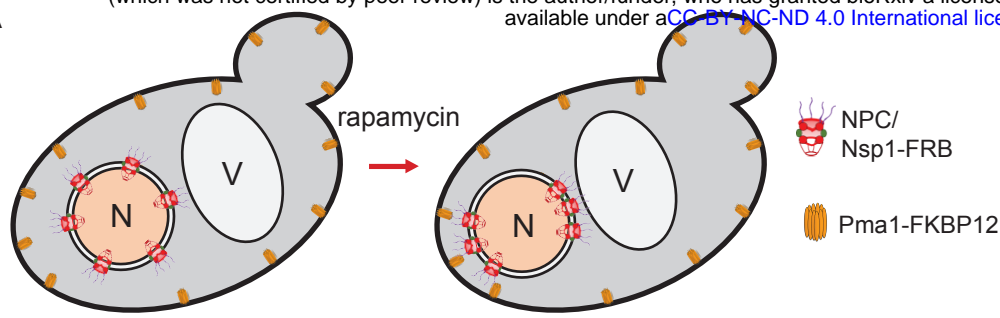

**B**

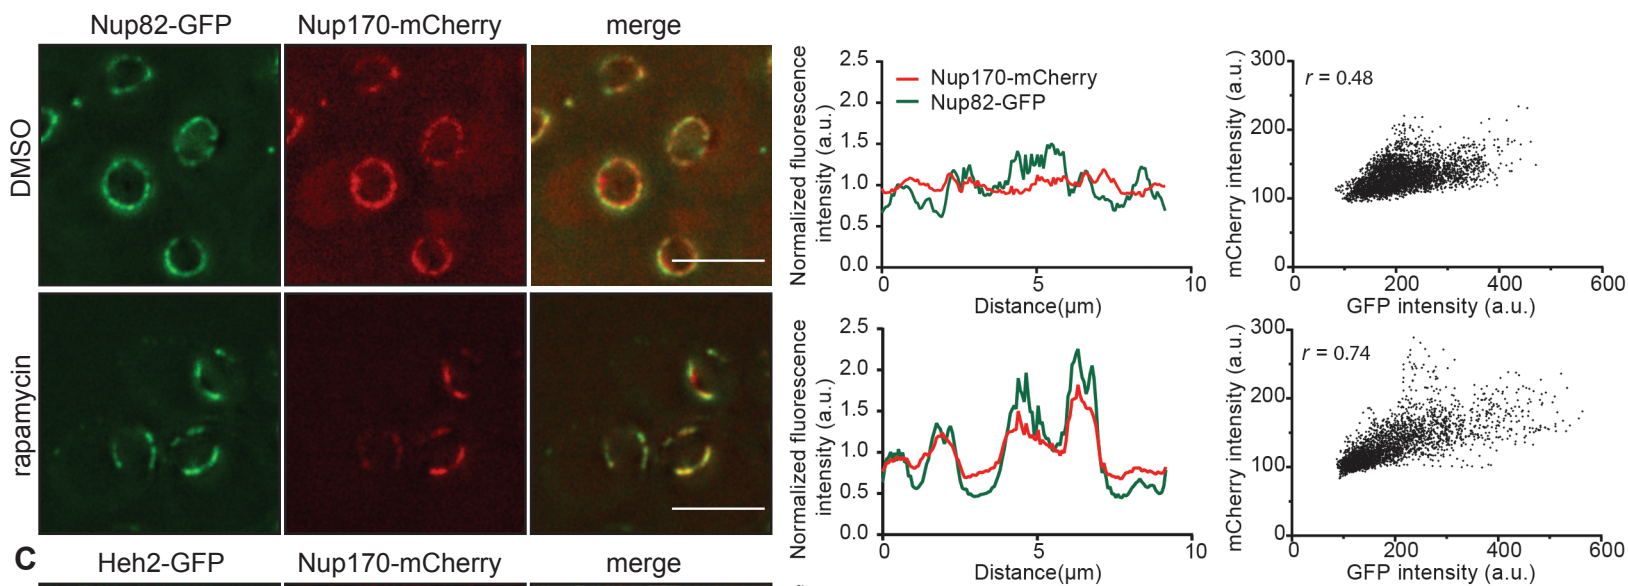

**C**

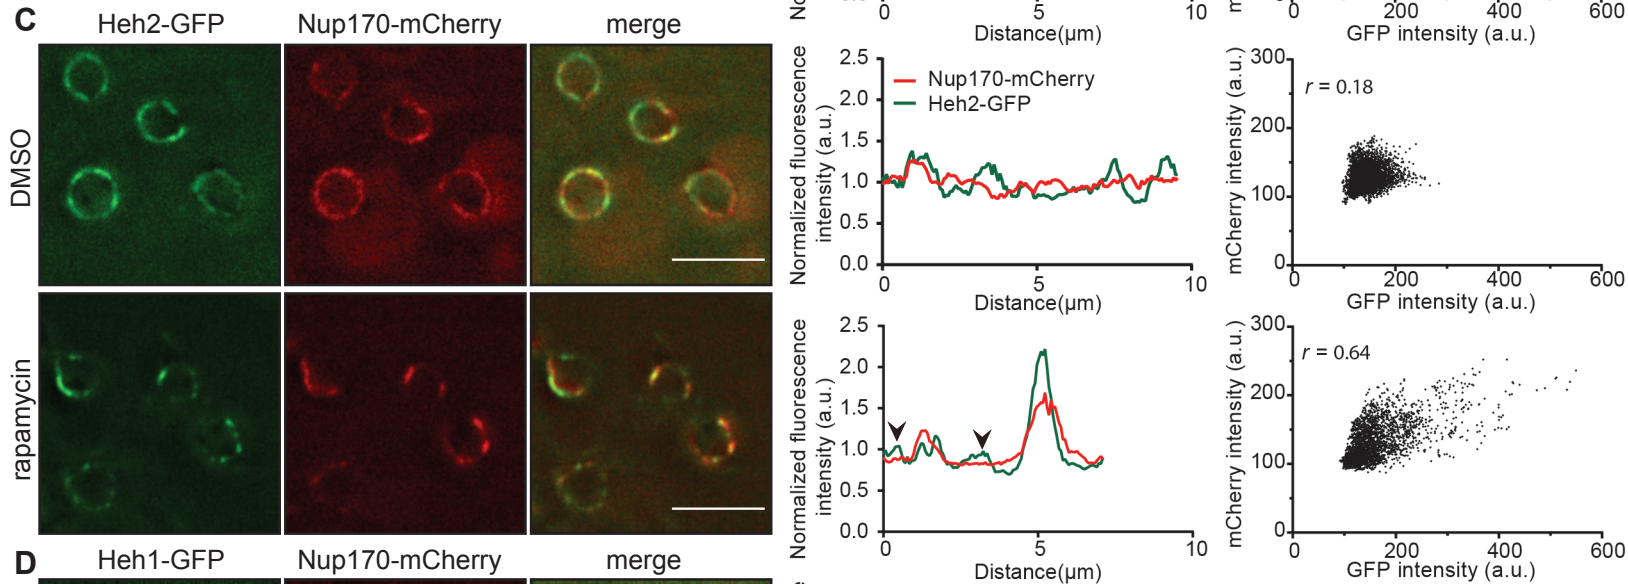

**D**

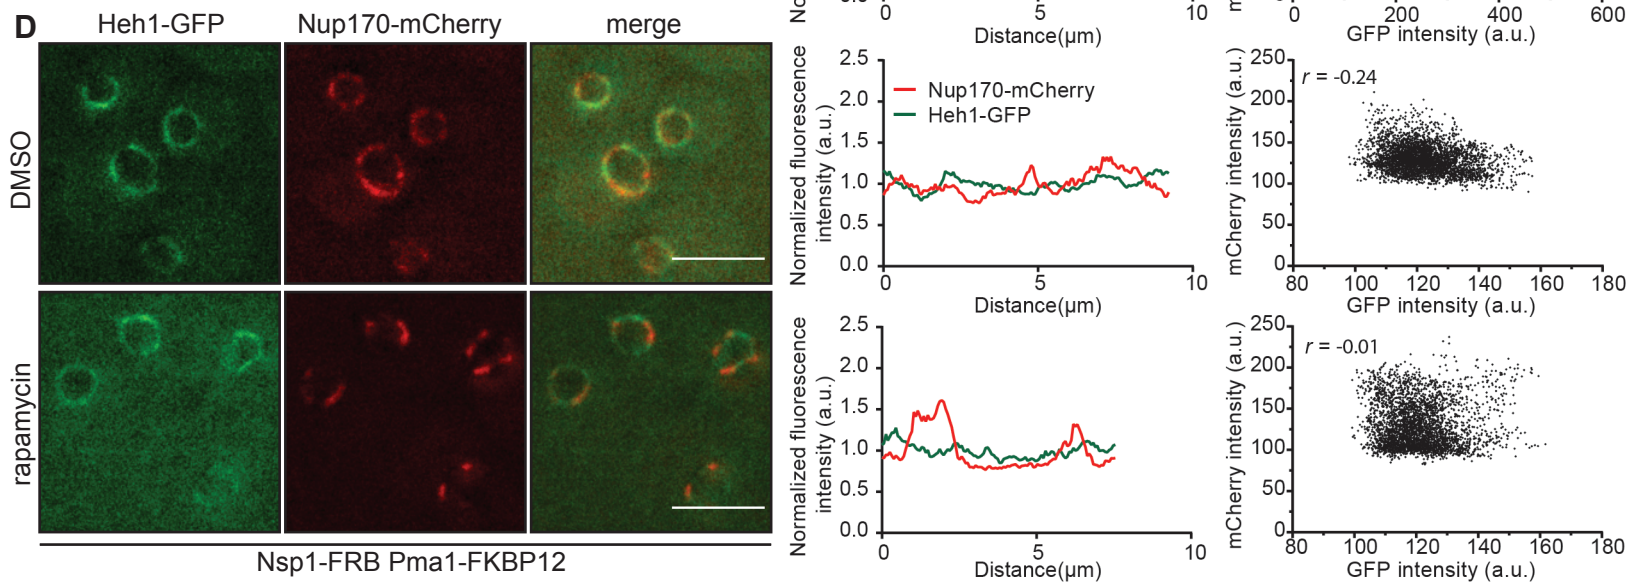

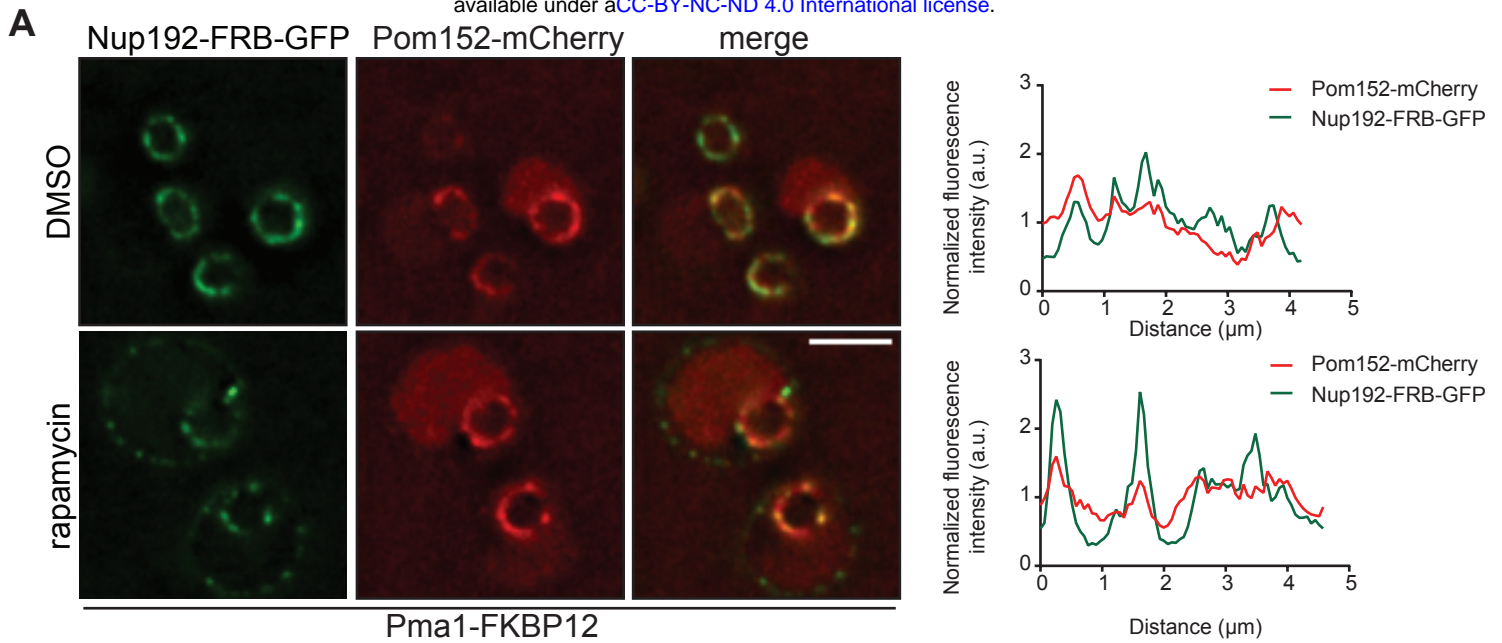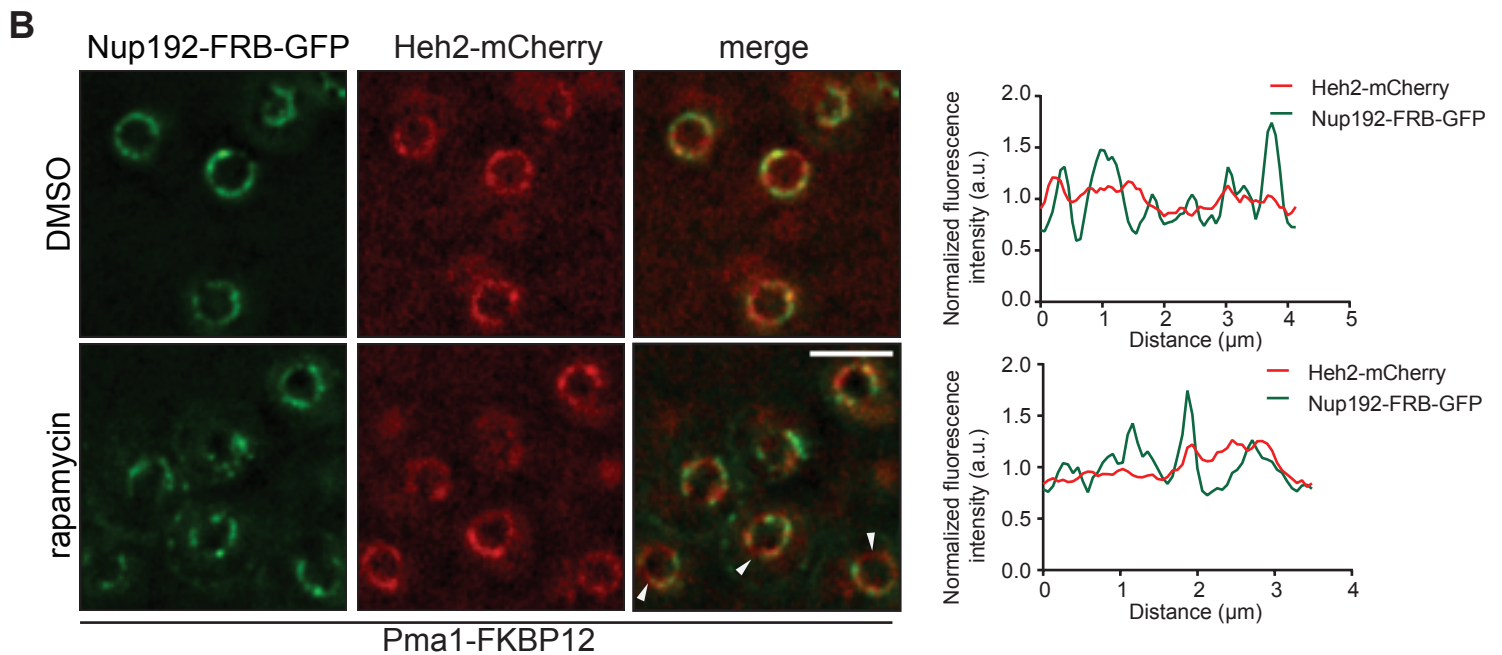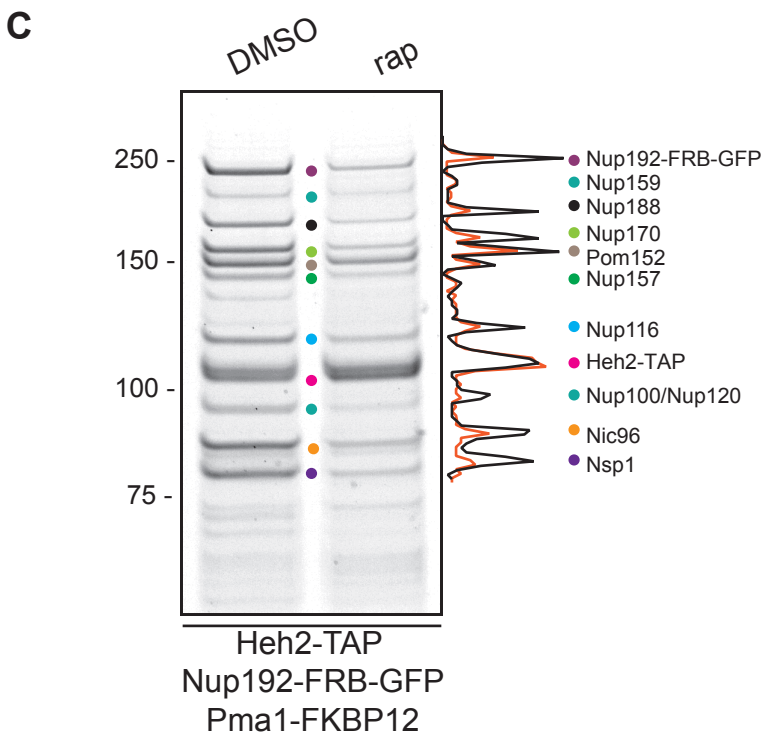

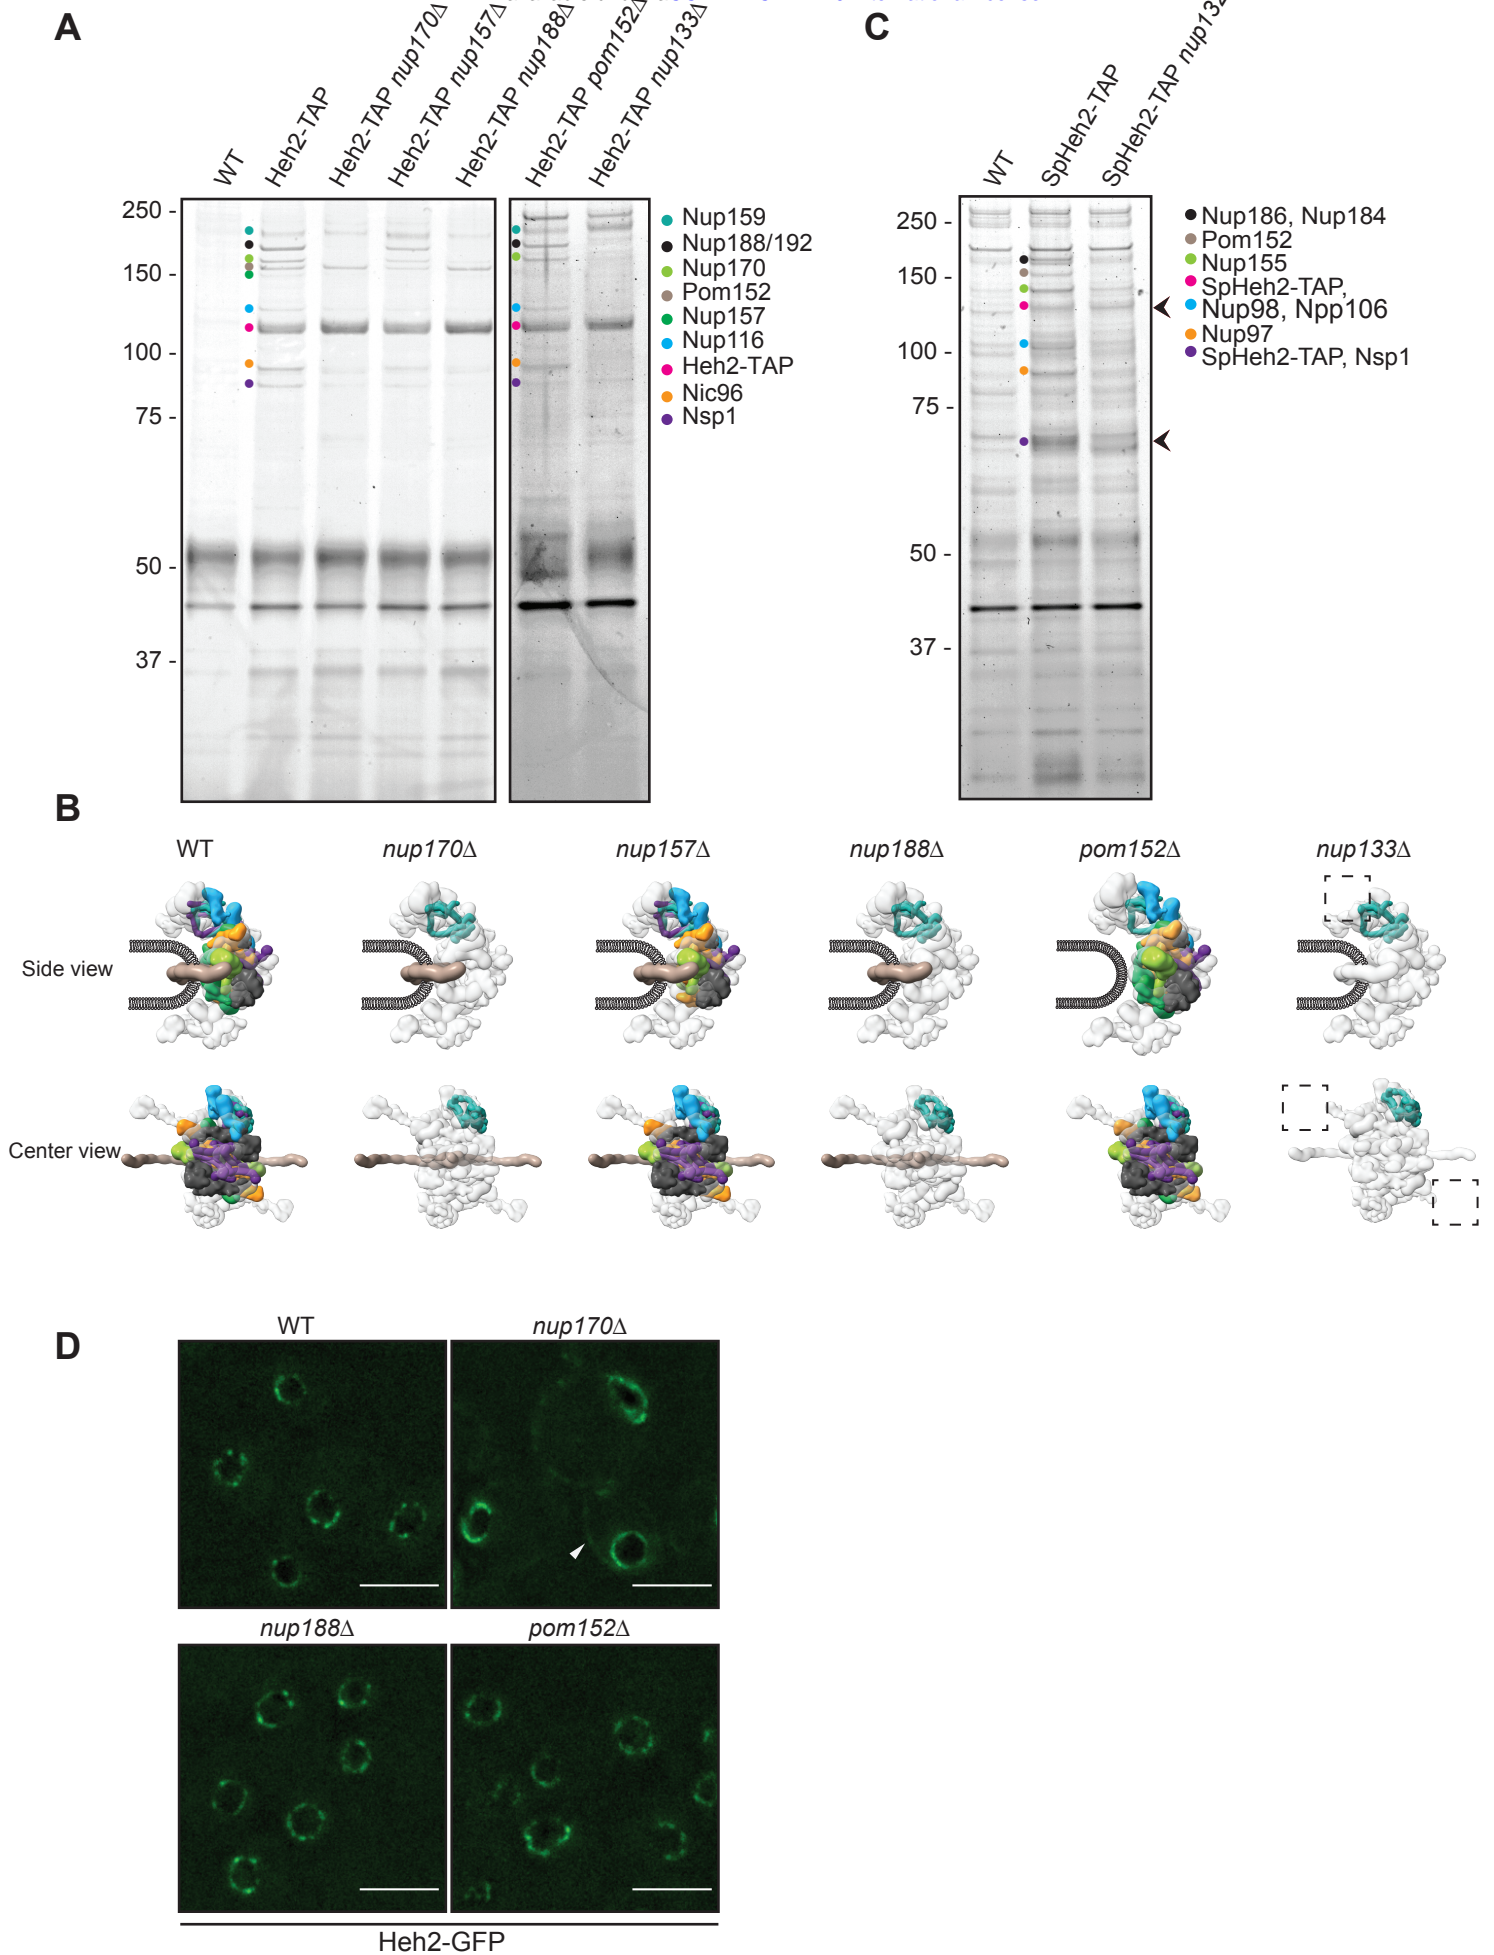

Borah et al., Figure 6

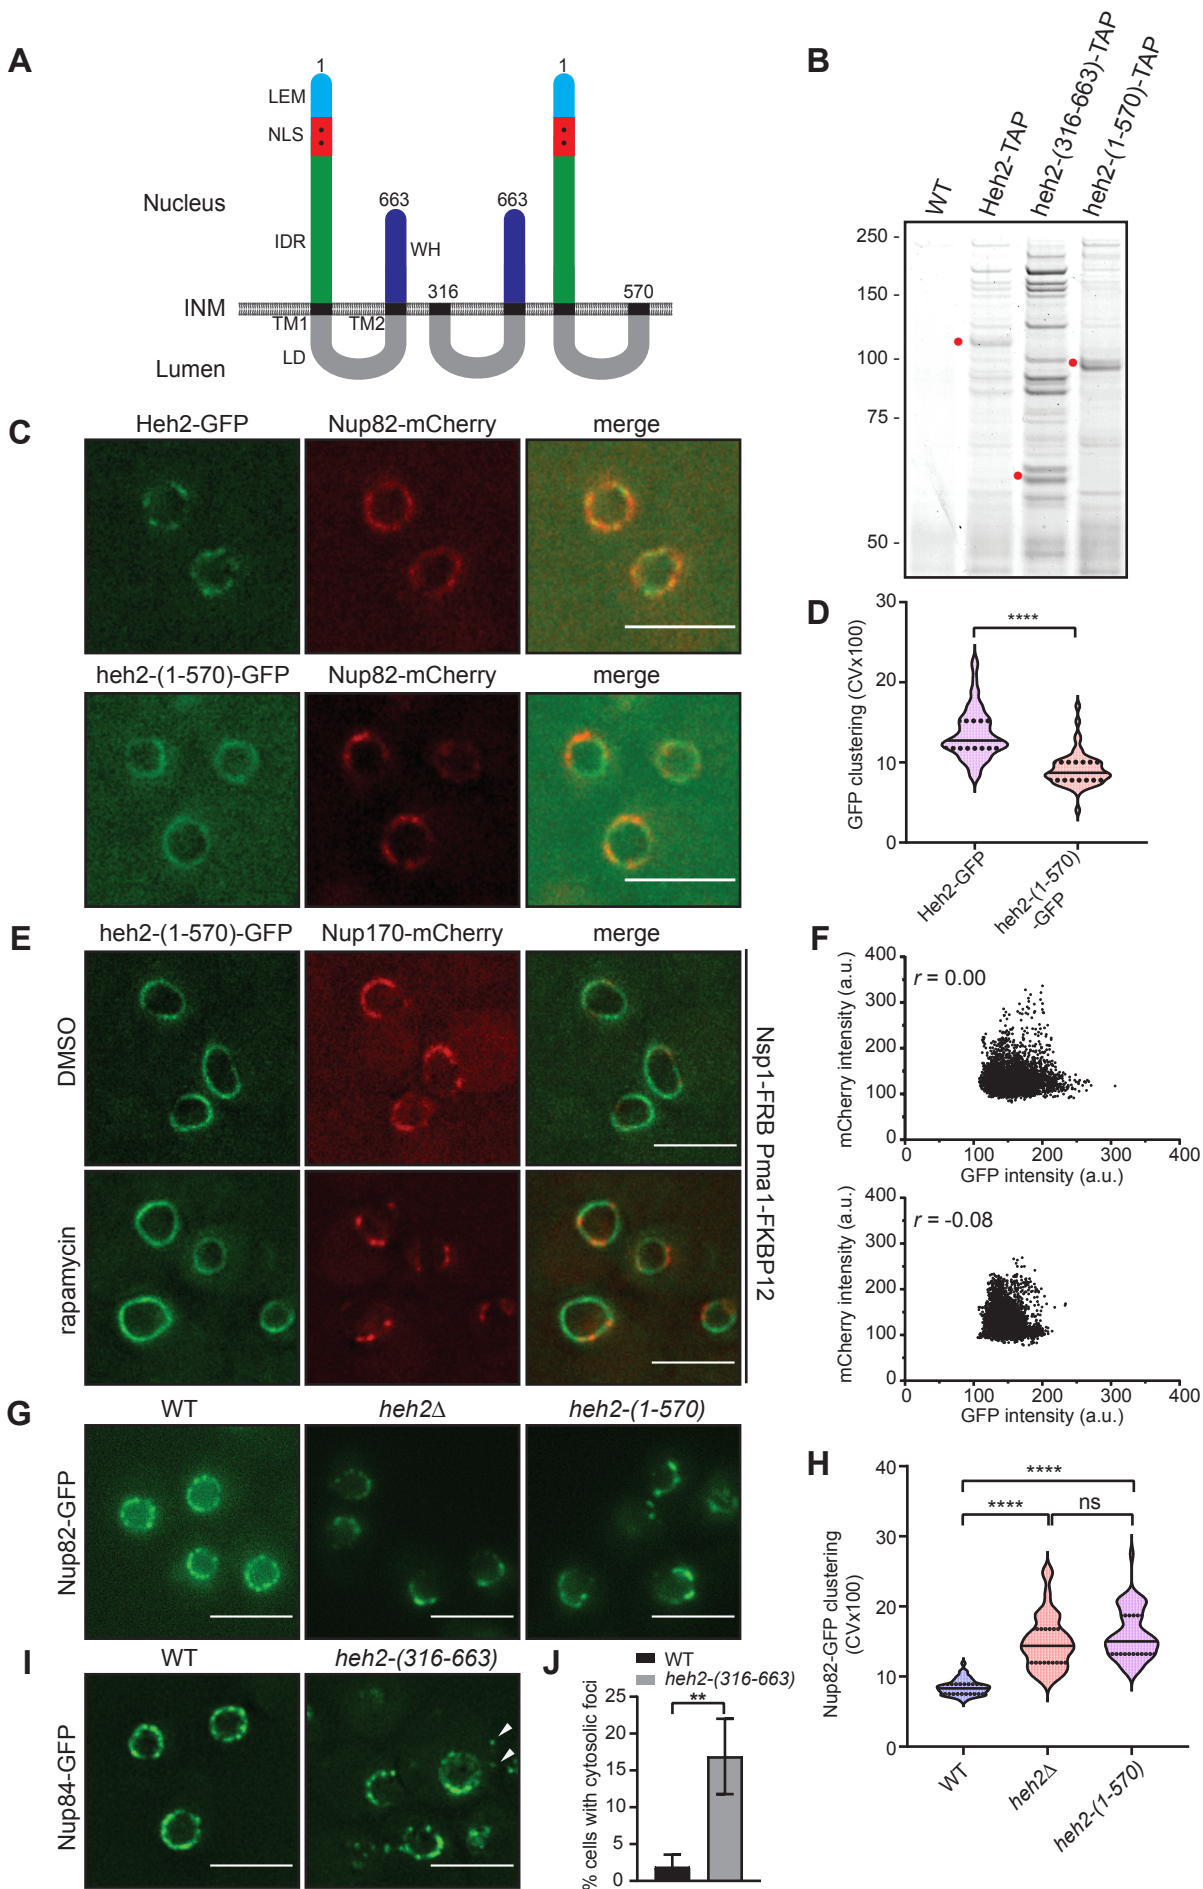

**Table S1. Yeast strains**  
**Saccharomyces cerevisiae strains**

| Name                                     | Genotype                                                                                                             | Origin                          | Generation                                                                           |
|------------------------------------------|----------------------------------------------------------------------------------------------------------------------|---------------------------------|--------------------------------------------------------------------------------------|
| W303a                                    | MATa, <i>ade2-1 can1-100 HIS33-11,15 leu2-3,112 trp1-1 ura3-1</i>                                                    | EUROSCARF                       |                                                                                      |
| W303c                                    | MATa, <i>ade2-1 can1-100 HIS33-11,15 leu2-3,112 trp1-1 ura3-1</i>                                                    | EUROSCARF                       |                                                                                      |
| CPL111                                   | W303, <i>heh2Δ::kanMX6</i>                                                                                           | This study                      |                                                                                      |
| CPL112                                   | W303, <i>heh2Δ::kanMX6</i>                                                                                           | This study                      |                                                                                      |
| SBCPL42                                  | Heh2-TAP::HIS                                                                                                        | Dharmacon                       |                                                                                      |
| SBCPL54                                  | W303, <i>HEH2-TAP::TRP1</i>                                                                                          | This study                      | Integration through PCR product transformation                                       |
| SBCPL174                                 | W303, <i>HEH1-TAP::HIS33</i>                                                                                         | Dharmacon                       |                                                                                      |
| SBCPL64                                  | W303, <i>heh2 (1-571)-TAP::KAN</i>                                                                                   | This study                      | Integration through PCR product transformation                                       |
| SBCPL122                                 | W303, <i>3xFLAG heh2(316-663)-TAP::TRP</i>                                                                           | This study                      | N-terminal 3xFLAG integration through PCR product transformation, Zhang et al., 2017 |
| SBCPL76                                  | W303, <i>heh2Δ::kanMX6 Nup82-GFP::TRP</i>                                                                            | This study                      | Integration through PCR product transformation                                       |
| SBCPL75                                  | W303, <i>heh2(1-571)-TAP::KAN NUP82-GFP::TRP</i>                                                                     | This study                      | Integration through PCR product transformation in SBCPL64                            |
| SBCPL88                                  | W303, <i>HEH2-3HA-GFP::hphMX6</i>                                                                                    | This study                      | Integration through PCR product transformation                                       |
| SBCPL89                                  | W303, <i>HEH2-3HA-GFP::hphMX6</i>                                                                                    | This study                      | Integration through PCR product transformation                                       |
| SBCPL139                                 | W303, <i>HEH2-3HA-GFP::hphMX6 NUP82-mCherry::natMX6</i>                                                              | This study                      | Progeny from cross between SBCPL138 and CVCPL109                                     |
| SBCPL96                                  | W303, <i>HEH2-TAP::TRP nup170 Δ::natMX6</i>                                                                          | This study                      | Progeny from cross between SBCPL54 and CPL634                                        |
| SBCPL56                                  | W303, <i>HEH2-TAP::TRP nup188 Δ::KAN</i>                                                                             | This study                      | Progeny from cross between SBCPL54 and CPL766                                        |
| SBCPL169                                 | W303, <i>HEH2-TAP::TRP nup157 Δ::hphMX6</i>                                                                          | This study                      | Progeny from cross between SBCPL54 and PCCPL240                                      |
| SBCPL61                                  | W303, <i>HEH2-TAP::hphMX6 nup133 Δ::kan</i>                                                                          | This study                      | Progeny from cross between SBCPL54 and CPL337                                        |
| SBCPL170                                 | W303, <i>HEH2-TAP-TAP::TAP pom152 Δ::kan</i>                                                                         | This study                      | Progeny from cross between SBCPL55 and CPL398                                        |
| SBCPL138                                 | W303, <i>HEH2-3HA-GFP::hphMX6 nup133 Δ::KAN</i>                                                                      | This study                      | Progeny from cross between SBCPL89 and CPL337                                        |
| SBCPL145                                 | W303, <i>HEH2-3HA-GFP::hphMX6 nup170 Δ::natMX6</i>                                                                   | This study                      | Progeny from cross between SBCPL89 and CPL634                                        |
| SBCPL157                                 | W303, <i>HEH2-3HA-GFP::hphMX6 pom152 Δ::KAN</i>                                                                      | This study                      | Progeny from cross between SBCPL88 and CPL399                                        |
| SBCPL157                                 | W303, <i>HEH2-3HA-GFP::hphMX6 nup188 Δ::KAN</i>                                                                      | This study                      | Progeny from cross between SBCPL88 and CPL768                                        |
| SBCPL140                                 | W303, <i>HEH2-3HA-GFP::hphMX6 NUP82-mCherry::natMX6 nup133 Δ::KAN</i>                                                | This study                      | Progeny from cross between SBCPL138 and CVCPL109                                     |
| HHY110                                   | W303, <i>MAT alpha tor1-1 fpr1::natMX6MX6 PMA1-2xFKBP12::TRP1</i>                                                    | Euroscarf (Haruki et al., 2008) |                                                                                      |
| CPL1230                                  | HHY110, <i>NSP1-FRB-GFP::HIS3MX6 NUP170-mCherry::kanMX6</i>                                                          | This study                      | PCR-based integration using pFA6a-mCherry-kanMX6 and pFA6a-FRB-GFP-His3MX6           |
| SBCPL84                                  | HHY110, <i>NSP1-FRB::HIS3 fpr1::natMX6 Pma1-2xFKBP12::TRP tor1-1 NUP170-mCherry::KAN HEH2-3HA-GFP::hphMX6</i>        | This study                      | Integration through PCR product transformation in CPL1230                            |
| SBCPL85                                  | HHY110, <i>NSP1-FRB::HIS3 fpr1::natMX6 Pma1-2xFKBP12::TRP tor1-1 NUP170-mCherry::KAN HEH1-3HA-GFP::hphMX6</i>        | This study                      | Integration through PCR product transformation in CPL1230                            |
| SBCPL86                                  | HHY110, <i>NSP1-FRB::HIS3 fpr1::natMX6 Pma1-2xFKBP12::TRP tor1-1 NUP170-mCherry::KAN NUP82-3HA-GFP::hphMX6</i>       | This study                      | Integration through PCR product transformation in CPL1230                            |
| SBCPL109                                 | HHY110, <i>NSP1-FRB::HIS3 fpr1::natMX6 Pma1-2xFKBP12::TRP tor1-1 NUP170-mCherry::KAN heh2(1-570)-3HA-GFP::hphMX6</i> | This study                      | Integration through PCR product transformation in CPL1230                            |
| SBCPL63                                  | HHY110, <i>HEH2-TAP::KAN Nup192-3xHA-FRB-GFP::HIS3 Pma1-2xFKBP12::TRP fpr1::natMX6 tor1-1</i>                        | This study                      | Integration through PCR product transformation in DTCPL1539                          |
| DTCPL1846                                | HHY110, <i>NUP192-3xHA-FRB-GFP::his3 POM152-mCherry::kanMX6 PMA1-2xFKBP12::TRP1 fpr1::natMX6 tor1-1</i>              | This study                      | Progeny from cross between DTCPL1539 and DTCPL1645                                   |
| DTCPL1881                                | HHY110, <i>NUP192-3xHA-FRB-GFP::his3 HEH2-3xHA-mCherry::kanMM6 PMA1-2xFKBP12::TRP1 fpr1::natMX6 tor1-1</i>           | This study                      | Progeny from cross between DTCPL1539 and DTCPL1870                                   |
| <b>Schizosaccharomyces pombe strains</b> |                                                                                                                      |                                 |                                                                                      |
| MKSP399                                  | <i>h+ leu1-32 ura4-D18</i>                                                                                           | This study                      |                                                                                      |
| MKSP3045                                 | <i>h+ Heh2-TAP::HygR leu1-32 ura4-D18</i>                                                                            | This study                      | Integration through PCR product transformation                                       |
| MKSP3049                                 | <i>h? Heh2-TAP::HygR nup132::KanR leu1-32 ura4-D18</i>                                                               | This study                      | Progeny from cross between MKSP3045 and MKSP264                                      |
| MKSP3071                                 | <i>h? Heh2-GFP::HygR Nup107-mCherry::NatR leu1-32 ura4-D18</i>                                                       | This study                      | Progeny from cross between MKSP1410 and MKSP1118                                     |
| MKSP3090                                 | <i>h+ Heh2-GFP::HygR Nup107-mCherry::NatR nup132::KanR leu1-32 ura4-D18</i>                                          | This study                      | Progeny from cross between MKSP3071 and MKSP264                                      |

Table S2. Plasmids

| <b>Name</b>          | <b>Description</b>                                                           | <b>Source</b>              |
|----------------------|------------------------------------------------------------------------------|----------------------------|
| pFA6a-GFP-his3MX6    | Template for PCR based chromosomal integration of GFP ORF                    | Longtine et al., 1998      |
| pFA6a-GFP-natMX6     | Template for PCR based chromosomal integration of GFP ORF                    | Van Driessche et al., 2005 |
| pFA6a-GFP-kanMX6     | Template for PCR based chromosomal integration of GFP ORF                    | Longtine et al., 1998      |
| pFA6a-hphMX6         | Template for PCR based chromosomal integration of hphMX6 cassette            | Longtine et al., 1998      |
| pFA6a-natMX6         | Template for PCR based chromosomal integration of natMX6 cassette            | Longtine et al., 1998      |
| pFA6a-kanMX6         | Template for PCR based chromosomal integration of kanMX6 cassette            | Longtine et al., 1998      |
| pFA6a-mCherry-kanMX6 | Template for PCR based chromosomal integration of mCherry ORF                | EUROSCARF                  |
| pFA6a-mCherry-natMX6 | Template for PCR based chromosomal integration of mCherry ORF                | EUROSCARF                  |
| pSBCPL3              | pFA6a-TAP-his3MX6, template for PCR based chromosomal integration of TAP-TAG | This study                 |
| pSBCPL4              | pFA6a-TAP-TRP, template for PCR based chromosomal integration of TAP-TAG     | This study                 |
| pK3F                 | N-ICE plasmid pK3F, for N-terminal 3×FLAG integration                        | Addgene                    |
| pSH47                | Cre recombinase under the <i>GAL1</i> promoter                               | EUROSCARF                  |
